# Supplementary material for: A unifying gene signature for adenoid cystic cancer identifies parallel MYB-dependent and MYB-independent therapeutic targets
Source: PubMed Central journal article supplement (PMC4350357; doi:10.18632/oncotarget.2985), 2014-12-10
Supplement: oncotarget-05-12528-s001.pdf [file oncotarget-05-12528-s001.pdf]

# A unifying gene signature for adenoid cystic cancer identifies parallel MYB-dependent and MYB-independent therapeutic targets

## Supplementary Material

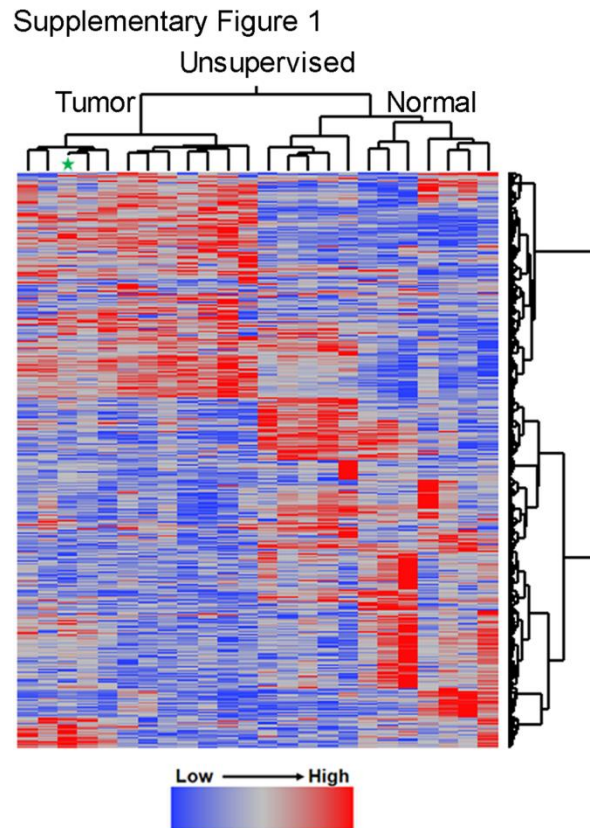

**Supplementary Figure 1: ACC tumor has distinct gene expression profile from the matched normal tissues.** Unsupervised hierarchical 2-way ward clustering analysis for ACC using 4027 annotated probe sets with  $Cov > 0.3$ .

Supplementary Figure 2

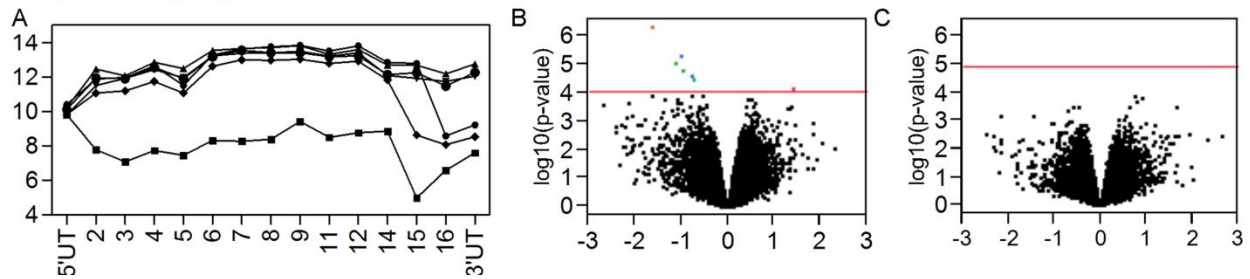

**Supplementary Figure 2; Comparison between MYB-NFIB fusion positive and fusion negative ACCs.** A) MYB exon plot for preselected fusion negative ACC tumors. One fusion negative tumor had low MYB expression and two ‘fusion negative’ tumors were identified as misclassified on the basis of loss expression of terminal MYB exons. B) and C) Volcano plot of significance levels against log<sub>2</sub> gene difference between tumors and matched normal samples before and after fusion status correction respectively (FDR=0.05).

Supplementary Figure 3

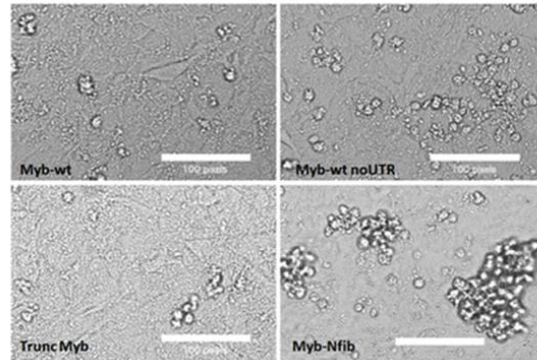

**Supplementary Figure 3: Altered morphology with oncospheres after forced expression of MYB-NFIB changed in short-term cultured wt FVB mouse salivary gland cells.** Murine salivary gland cells were co-transfected with hTERT and MYB-/NFIB expression plasmids. Pictures were taken under 10x microscopy.

**Supplementary Table 1: Significantly expressed genes in adenoid cystic cancers compared to matched normal tissues.** Paired t-test, FDR=0.05; Baseline filter:  $\max\{\text{tumor, normal}\} \geq 50$ ; Baseline filter:  $|\text{fold change}| \geq 2.0$ .

| probeset_id | Symbol          | Gene_Name                                                                       | FC_T/N |
|-------------|-----------------|---------------------------------------------------------------------------------|--------|
| 8122202     | MYB             | v-myb myeloblastosis viral oncogene homolog (avian)                             | 17.8   |
| 8095806     | ART3            | ADP-ribosyltransferase 3                                                        | 15.2   |
| 8106743     | VCAN            | versican                                                                        | 13.6   |
| 7988563     | SHC4            | SHC (Src homology 2 domain containing) family, member 4                         | 12.0   |
| 8109926     | GABRP           | gamma-aminobutyric acid (GABA) A receptor, pi                                   | 10.6   |
| 7953873     | OVOS            | ovostatin                                                                       | 10.0   |
| 7961026     | LOC728715       | ovostatin homolog 2-like                                                        | 9.3    |
| 8132743     | ABCA13          | ATP-binding cassette, sub-family A (ABC1), member 13                            | 9.2    |
| 8078619     | ITGA9           | integrin, alpha 9                                                               | 9.2    |
| 8123104     | FNDC1           | fibronectin type III domain containing 1                                        | 8.7    |
| 8121784     | FABP7           | fatty acid binding protein 7, brain                                             | 8.5    |
| 7904843     | PDZK1           | PDZ domain containing 1                                                         | 8.3    |
| 7918936     | VTCN1           | V-set domain containing T cell activation inhibitor 1                           | 8.3    |
| 8168534     | TBX22           | T-box 22                                                                        | 8.2    |
| 8142194     | LAMB1           | laminin, beta 1                                                                 | 7.6    |
| 8117170     | ENSG00000222515 | ncrna:misc_RNA chromosome:GRCh37:6:22085773:22086147:1                          | 7.3    |
| 8074856     | PRAME           | preferentially expressed antigen in melanoma                                    | 7.2    |
| 7919787     | HORMAD1         | HORMA domain containing 1                                                       | 7.0    |
| 7991234     | MFGE8           | milk fat globule-EGF factor 8 protein                                           | 7.0    |
| 8074168     | Broad TUCP      | linc-OR4Q3-3 chr14:+:19650031-19684290                                          | 6.9    |
| 8049187     | EFHD1           | EF-hand domain family, member D1                                                | 6.8    |
| 8112971     | HAPLN1          | hyaluronan and proteoglycan link protein 1                                      | 6.5    |
| 8112980     | EDIL3           | EGF-like repeats and discoidin I-like domains 3                                 | 6.5    |
| 8096511     | BMPRI1B         | bone morphogenetic protein receptor, type IB                                    | 6.3    |
| 7983527     | SEMA6D          | sema domain, transmembrane domain (TM), and cytoplasmic domain, (semaphorin) 6D | 6.2    |
| 8080562     | IL17RB          | interleukin 17 receptor B                                                       | 6.2    |
| 8050007     | PXDN            | peroxidasin homolog (Drosophila)                                                | 6.1    |
| 8001197     | NETO2           | neuropilin (NRP) and tolloid (TLL)-like 2                                       | 6.1    |
| 8160459     | ELAVL2          | ELAV (embryonic lethal, abnormal vision, Drosophila)-like 2 (Hu antigen B)      | 5.8    |
| 8055153     | POTEE           | POTE ankyrin domain family, member E                                            | 5.6    |
| 8144228     | FLJ36840        | uncharacterized LOC645524                                                       | 5.5    |
| 7926875     | BAMBI           | BMP and activin membrane-bound inhibitor homolog (Xenopus laevis)               | 5.5    |
| 8140035     | FLJ26938        | Homo sapiens cDNA FLJ26938 fis, clone RCT07169.                                 | 5.5    |
| 8108688     | PCDHB3          | protocadherin beta 3                                                            | 5.4    |
| 7991186     | NTRK3           | neurotrophic tyrosine kinase, receptor, type 3                                  | 5.4    |
| 7925320     | NID1            | nidogen 1                                                                       | 5.3    |
| 8054037     | RN5S101         | RNA, 5S ribosomal 101                                                           | 5.2    |
| 7910047     | DNAH14          | dynein, axonemal, heavy chain 14                                                | 5.2    |
| 8164843     | OBP2B           | odorant binding protein 2B                                                      | 5.1    |

| probeset_id | Symbol       | Gene_Name                                                                                     | FC_T/N |
|-------------|--------------|-----------------------------------------------------------------------------------------------|--------|
| 8122202     | MYB          | v-myb myeloblastosis viral oncogene homolog (avian)                                           | 17.8   |
| 8103706     | AADAT        | aminoadipate aminotransferase                                                                 | 5.1    |
| 8121850     | HEY2         | hairy                                                                                         | 5.1    |
| 8104079     | FAT1         | FAT tumor suppressor homolog 1 (Drosophila)                                                   | 5.1    |
| 8095110     | KIT          | v-kit Hardy-Zuckerman 4 feline sarcoma viral oncogene homolog                                 | 5.0    |
| 8088848     | PDZRN3       | PDZ domain containing ring finger 3                                                           | 5.0    |
| 8077366     | LRRN1        | leucine rich repeat neuronal 1                                                                | 5.0    |
| 8059376     | SERPINE2     | serpin peptidase inhibitor, clade E (nexin, plasminogen activator inhibitor type 1), member 2 | 4.9    |
| 8017039     | SEPT4        | septin 4                                                                                      | 4.9    |
| 8103736     | SCRG1        | stimulator of chondrogenesis 1                                                                | 4.8    |
| 8097957     | GUCY1A3      | guanylate cyclase 1, soluble, alpha 3                                                         | 4.8    |
| 8027348     | ZNF730       | zinc finger protein 730                                                                       | 4.8    |
| 8013272     | CCDC144A     | coiled-coil domain containing 144A                                                            | 4.8    |
| 7987405     | RASGRP1      | RAS guanyl releasing protein 1 (calcium and DAG-regulated)                                    | 4.8    |
| 8096704     | NPNT         | nephronectin                                                                                  | 4.7    |
| 8127446     | COL9A1       | collagen, type IX, alpha 1                                                                    | 4.7    |
| 8055222     | POTEF        | POTE ankyrin domain family, member F                                                          | 4.7    |
| 8041467     | VIT          | vitrin                                                                                        | 4.6    |
| 8140955     | CDK6         | cyclin-dependent kinase 6                                                                     | 4.6    |
| 7947274     | MPPED2       | metallophosphoesterase domain containing 2                                                    | 4.6    |
| 8047248     | PLCL1        | phospholipase C-like 1                                                                        | 4.5    |
| 8043687     | ANKRD36C     | ankyrin repeat domain 36C                                                                     | 4.5    |
| 8090133     | CCDC14       | coiled-coil domain containing 14                                                              | 4.5    |
| 8036302     | LOC100506930 | uncharacterized LOC100506930                                                                  | 4.5    |
| 8128284     | EPHA7        | EPH receptor A7                                                                               | 4.4    |
| 8141140     | DLX5         | distal-less homeobox 5                                                                        | 4.4    |
| 8168589     | ZNF711       | zinc finger protein 711                                                                       | 4.4    |
| 7911241     | OR2L8        | olfactory receptor, family 2, subfamily L, member 8                                           | 4.4    |
| 8028924     | MIA-RAB4B    | MIA-RAB4B readthrough                                                                         | 4.4    |
| 7969288     | OLFM4        | olfactomedin 4                                                                                | 4.4    |
| 8147000     | ZFHX4        | zinc finger homeobox 4                                                                        | 4.3    |
| 7988444     | MYEF2        | myelin expression factor 2                                                                    | 4.3    |
| 7908924     | PRELP        | proline                                                                                       | 4.3    |
| 8099982     | APBB2        | amyloid beta (A4) precursor protein-binding, family B, member 2                               | 4.2    |
| 8054054     | ANKRD36B     | ankyrin repeat domain 36B                                                                     | 4.2    |
| 8111490     | PRLR         | prolactin receptor                                                                            | 4.2    |
| 8151684     | MMP16        | matrix metalloproteinase 16 (membrane-inserted)                                               | 4.2    |
| 8067305     | SYCP2        | synaptonemal complex protein 2                                                                | 4.1    |
| 7913869     | STMN1        | stathmin 1                                                                                    | 4.1    |
| 7932407     | ST8SIA6      | ST8 alpha-N-acetyl-neuraminide alpha-2,8-sialyltransferase 6                                  | 4.1    |
| 7945680     | H19          | H19, imprinted maternally expressed transcript (non-protein coding)                           | 4.1    |
| 8046428     | RAPGEF4      | Rap guanine nucleotide exchange factor (GEF) 4                                                | 4.1    |
| 7946323     | OR5P2        | olfactory receptor, family 5, subfamily P, member 2                                           | 4.1    |

| probeset_id | Symbol       | Gene_Name                                                                    | FC_T/N |
|-------------|--------------|------------------------------------------------------------------------------|--------|
| 8122202     | MYB          | v-myb myeloblastosis viral oncogene homolog (avian)                          | 17.8   |
| 8051573     | CDC42EP3     | CDC42 effector protein (Rho GTPase binding) 3                                | 4.1    |
| 7908816     | LGR6         | leucine-rich repeat containing G protein-coupled receptor 6                  | 4.0    |
| 8136645     | TAS2R4       | taste receptor, type 2, member 4                                             | 4.0    |
| 7925525     | CEP170       | centrosomal protein 170kDa                                                   | 4.0    |
| 8108724     | PCDHB10      | protocadherin beta 10                                                        | 4.0    |
| 8005110     | ZNF286A      | zinc finger protein 286A                                                     | 3.9    |
| 7938364     | WEE1         | WEE1 homolog (S. pombe)                                                      | 3.9    |
| 8021946     | COLEC12      | collectin sub-family member 12                                               | 3.9    |
| 8106784     | RASA1        | RAS p21 protein activator (GTPase activating protein) 1                      | 3.9    |
| 8144699     | AY461701     | Homo sapiens liver-related low express protein 1 (LRLE1) mRNA, complete cds. | 3.8    |
| 8108744     | PCDHB14      | protocadherin beta 14                                                        | 3.8    |
| 8043697     | ANKRD36      | ankyrin repeat domain 36                                                     | 3.8    |
| 8150509     | PLAT         | plasminogen activator, tissue                                                | 3.8    |
| 8156199     | DAPK1        | death-associated protein kinase 1                                            | 3.8    |
| 7951140     | LOC100131541 | uncharacterized LOC100131541                                                 | 3.8    |
| 7961514     | MGP          | matrix Gla protein                                                           | 3.8    |
| 8171359     | GPM6B        | glycoprotein M6B                                                             | 3.8    |
| 8179595     | GABBR1       | gamma-aminobutyric acid (GABA) B receptor, 1                                 | 3.7    |
| 7927681     | BICC1        | bicaudal C homolog 1 (Drosophila)                                            | 3.7    |
| 8076894     | MLC1         | megalencephalic leukoencephalopathy with subcortical cysts 1                 | 3.7    |
| 7951217     | MMP7         | matrix metalloproteinase 7 (matrilysin, uterine)                             | 3.7    |
| 8139977     | STAG3L3      | stromal antigen 3-like 3                                                     | 3.7    |
| 7933437     | PTPN20B      | protein tyrosine phosphatase, non-receptor type 20B                          | 3.7    |
| 8150318     | FGFR1        | fibroblast growth factor receptor 1                                          | 3.7    |
| 8052845     | TIA1         | TIA1 cytotoxic granule-associated RNA binding protein                        | 3.6    |
| 8031157     | TTYH1        | twety homolog 1 (Drosophila)                                                 | 3.6    |
| 8142270     | NRCAM        | neuronal cell adhesion molecule                                              | 3.6    |
| 7963353     | KRT81        | keratin 81                                                                   | 3.6    |
| 8005231     | FAM106A      | family with sequence similarity 106, member A                                | 3.6    |
| 8019831     | CLUL1        | clusterin-like 1 (retinal)                                                   | 3.6    |
| 7912887     | MFAP2        | microfibrillar-associated protein 2                                          | 3.6    |
| 8115327     | SPARC        | secreted protein, acidic, cysteine-rich (osteonectin)                        | 3.6    |
| 7997504     | CDH13        | cadherin 13, H-cadherin (heart)                                              | 3.5    |
| 8068833     | PDE9A        | phosphodiesterase 9A                                                         | 3.5    |
| 8140196     | STAG3L1      | stromal antigen 3-like 1                                                     | 3.5    |
| 8020321     | AF090940     | Homo sapiens clone HQ0644 PRO0644 mRNA, complete cds.                        | 3.5    |
| 8157383     | COL27A1      | collagen, type XXVII, alpha 1                                                | 3.5    |
| 8064978     | JAG1         | jagged 1                                                                     | 3.5    |
| 8108683     | PCDHB2       | protocadherin beta 2                                                         | 3.5    |
| 7938834     | NAV2         | neuron navigator 2                                                           | 3.5    |
| 7900336     | AY527403     | Homo sapiens 10kDa eEF1A interacting protein mRNA, complete cds.             | 3.4    |
| 8165217     | NOTCH1       | notch 1                                                                      | 3.4    |

| probeset_id | Symbol       | Gene_Name                                                                              | FC_T/N |
|-------------|--------------|----------------------------------------------------------------------------------------|--------|
| 8122202     | MYB          | v-myb myeloblastosis viral oncogene homolog (avian)                                    | 17.8   |
| 8146711     | C8orf44      | chromosome 8 open reading frame 44                                                     | 3.4    |
| 7970033     | COL4A2       | collagen, type IV, alpha 2                                                             | 3.4    |
| 7952451     | LOC100130428 | IGYY565                                                                                | 3.4    |
| 8047910     | PTH2R        | parathyroid hormone 2 receptor                                                         | 3.4    |
| 8005679     | CCDC144B     | coiled-coil domain containing 144B (pseudogene)                                        | 3.4    |
| 7964665     | DPY19L2      | dpy-19-like 2 (C. elegans)                                                             | 3.4    |
| 8039607     | PEG3         | paternally expressed 3                                                                 | 3.4    |
| 8084923     | LOC401109    | uncharacterized LOC401109                                                              | 3.4    |
| 8140258     | PMS2P6       | postmeiotic segregation increased 2 pseudogene 6                                       | 3.3    |
| 8155754     | MAMDC2       | MAM domain containing 2                                                                | 3.3    |
| 8130867     | THBS2        | thrombospondin 2                                                                       | 3.3    |
| 8120067     | SLC25A27     | solute carrier family 25, member 27                                                    | 3.3    |
| 8140668     | SEMA3A       | sema domain, immunoglobulin domain (Ig), short basic domain, secreted, (semaphorin) 3A | 3.3    |
| 7926545     | PLXDC2       | plexin domain containing 2                                                             | 3.3    |
| 8005957     | SNORD4B      | small nucleolar RNA, C                                                                 | 3.3    |
| 8047487     | FZD7         | frizzled family receptor 7                                                             | 3.3    |
| 8148000     | AARD         | alanine and arginine rich domain containing protein                                    | 3.3    |
| 7903188     | PTBP2        | polypyrimidine tract binding protein 2                                                 | 3.3    |
| 8110666     | TRIM52       | tripartite motif containing 52                                                         | 3.3    |
| 8112521     | NAIP         | NLR family, apoptosis inhibitory protein                                               | 3.3    |
| 8078461     | FBXL2        | F-box and leucine-rich repeat protein 2                                                | 3.3    |
| 8124166     | MBOAT1       | membrane bound O-acyltransferase domain containing 1                                   | 3.2    |
| 8108749     | PCDHB18      | protocadherin beta 18 pseudogene                                                       | 3.2    |
| 7916984     | MIR186       | microRNA 186                                                                           | 3.2    |
| 8152453     | TRPS1        | trichorhinophalangeal syndrome 1                                                       | 3.2    |
| 8133309     | PMS2P5       | postmeiotic segregation increased 2 pseudogene 5                                       | 3.2    |
| 7912157     | ERRFI1       | ERBB receptor feedback inhibitor 1                                                     | 3.2    |
| 7925257     | LYST         | lysosomal trafficking regulator                                                        | 3.2    |
| 8078196     | KCNH8        | potassium voltage-gated channel, subfamily H (eag-related), member 8                   | 3.2    |
| 7911252     | OR2L2        | olfactory receptor, family 2, subfamily L, member 2                                    | 3.2    |
| 8054831     | EN1          | engrailed homeobox 1                                                                   | 3.2    |
| 8140280     | PMS2L2       | postmeiotic segregation increased 2-like 2 pseudogene                                  | 3.2    |
| 8054020     | FAM178B      | family with sequence similarity 178, member B                                          | 3.2    |
| 8012464     | LOC100128288 | uncharacterized LOC100128288                                                           | 3.2    |
| 8144726     | TUSC3        | tumor suppressor candidate 3                                                           | 3.2    |
| 8113504     | NREP         | neuronal regeneration related protein homolog (rat)                                    | 3.2    |
| 7952986     | WNK1         | WNK lysine deficient protein kinase 1                                                  | 3.1    |
| 8023646     | BCL2         | B-cell CLL                                                                             | 3.1    |
| 7982187     | APBA2        | amyloid beta (A4) precursor protein-binding, family A, member 2                        | 3.1    |
| 8048411     | TTLL4        | tubulin tyrosine ligase-like family, member 4                                          | 3.1    |
| 8109159     | MIR145       | microRNA 145                                                                           | 3.1    |
| 8063536     | TFAP2C       | transcription factor AP-2 gamma (activating enhancer binding protein 2 gamma)          | 3.1    |

| probeset_id | Symbol                    | Gene_Name                                                                  | FC_T/N |
|-------------|---------------------------|----------------------------------------------------------------------------|--------|
| 8122202     | MYB                       | v-myb myeloblastosis viral oncogene homolog (avian)                        | 17.8   |
| 7967358     | PITPNM2                   | phosphatidylinositol transfer protein, membrane-associated 2               | 3.1    |
| 8129273     | C6orf170                  | chromosome 6 open reading frame 170                                        | 3.1    |
| 8139896     | PMS2P4                    | postmeiotic segregation increased 2 pseudogene 4                           | 3.1    |
| 8133106     | SNORA22                   | small nucleolar RNA, H                                                     | 3.1    |
| 7908861     | OCR1                      | ovarian cancer-related protein 1                                           | 3.1    |
| 8091411     | TM4SF1                    | transmembrane 4 L six family member 1                                      | 3.0    |
| 7972983     | POTEG                     | POTE ankyrin domain family, member G                                       | 3.0    |
| 8006336     | LRRC37B                   | leucine rich repeat containing 37B                                         | 3.0    |
| 8027297     | ZNF738                    | zinc finger protein 738                                                    | 3.0    |
| 8035793     | ZNF737                    | zinc finger protein 737                                                    | 3.0    |
| 7945110     | ST3GAL4                   | ST3 beta-galactoside alpha-2,3-sialyltransferase 4                         | 3.0    |
| 8138592     | TRA2A                     | transformer 2 alpha homolog (Drosophila)                                   | 3.0    |
| 7902957     | EPHX4                     | epoxide hydrolase 4                                                        | 3.0    |
| 8108753     | PCDHB15                   | protocadherin beta 15                                                      | 3.0    |
| 8098439     | EPCAM                     | epithelial cell adhesion molecule                                          | 3.0    |
| 8074286     | MICAL3                    | microtubule associated monooxygenase, calponin and LIM domain containing 3 | 3.0    |
| 8081564     | CD96                      | CD96 molecule                                                              | 3.0    |
| 7982366     | SCG5                      | secretogranin V (7B2 protein)                                              | 3.0    |
| 7924817     | PRO2012                   | uncharacterized protein PRO2012                                            | 2.9    |
| 7972750     | COL4A1                    | collagen, type IV, alpha 1                                                 | 2.9    |
| 7938989     | GAS2                      | growth arrest-specific 2                                                   | 2.9    |
| 8145669     | RBPMS                     | RNA binding protein with multiple splicing                                 | 2.9    |
| 8131263     | SNORD13P2                 | small nucleolar RNA, C                                                     | 2.9    |
| 8044225     | SULT1C4                   | sulfotransferase family, cytosolic, 1C, member 4                           | 2.9    |
| 8103695     | MFAP3L                    | microfibrillar-associated protein 3-like                                   | 2.9    |
| 8083677     | SCHIP1                    | schwannomin interacting protein 1                                          | 2.9    |
| 8053266     | TACR1                     | tachykinin receptor 1                                                      | 2.9    |
| 8133754     | DTX2P1-UPK3BP1-<br>PMS2P1 | DTX2P1-UPK3BP1-PMS2P1 readthrough (non-protein coding)                     | 2.9    |
| 7996954     | NFAT5                     | nuclear factor of activated T-cells 5, tonicity-responsive                 | 2.9    |
| 8150978     | CA8                       | carbonic anhydrase VIII                                                    | 2.9    |
| 8102720     | ANKRD50                   | ankyrin repeat domain 50                                                   | 2.9    |
| 7968417     | FRY                       | furry homolog (Drosophila)                                                 | 2.9    |
| 8047659     | ABI2                      | abl-interactor 2                                                           | 2.9    |
| 8141395     | MCM7                      | minichromosome maintenance complex component 7                             | 2.9    |
| 8010978     | LOC100130876              | uncharacterized LOC100130876                                               | 2.8    |
| 8055143     | LOC440905                 | uncharacterized LOC440905                                                  | 2.8    |
| 7961291     | TAS2R31                   | taste receptor, type 2, member 31                                          | 2.8    |
| 8070584     | TMPRSS3                   | transmembrane protease, serine 3                                           | 2.8    |
| 8091402     | TM4SF18                   | transmembrane 4 L six family member 18                                     | 2.8    |
| 7961285     | TAS2R20                   | taste receptor, type 2, member 20                                          | 2.8    |
| 8157727     | GPR21                     | G protein-coupled receptor 21                                              | 2.8    |
| 7963054     | TUBA1A                    | tubulin, alpha 1a                                                          | 2.8    |



| probeset_id | Symbol       | Gene_Name                                                                                 | FC_T/N |
|-------------|--------------|-------------------------------------------------------------------------------------------|--------|
| 8122202     | MYB          | v-myb myeloblastosis viral oncogene homolog (avian)                                       | 17.8   |
| 8033818     | OLFM2        | olfactomedin 2                                                                            | 2.8    |
| 8147461     | SDC2         | syndecan 2                                                                                | 2.8    |
| 8001067     | HERC2P4      | hect domain and RLD 2 pseudogene 4                                                        | 2.8    |
| 8116247     | ZNF354A      | zinc finger protein 354A                                                                  | 2.8    |
| 7911329     | LOC100134822 | uncharacterized LOC100134822                                                              | 2.8    |
| 7916669     | DOCK7        | dedicator of cytokinesis 7                                                                | 2.8    |
| 8084524     | EPHB3        | EPH receptor B3                                                                           | 2.8    |
| 8022424     | NFIP3        | neurofibromin 1 pseudogene 3                                                              | 2.8    |
| 8137666     | SEPT14       | septin 14                                                                                 | 2.8    |
| 7906307     | KIRREL       | kin of IRRE like (Drosophila)                                                             | 2.8    |
| 8079021     | CTNNB1       | catenin (cadherin-associated protein), beta 1, 88kDa                                      | 2.8    |
| 8057959     | PGAP1        | post-GPI attachment to proteins 1                                                         | 2.8    |
| 7976496     | SERPINA3     | serpin peptidase inhibitor, clade A (alpha-1 antiproteinase, antitrypsin), member 3       | 2.8    |
| 7969794     | LOC100132099 | FRSS1829                                                                                  | 2.8    |
| 8083594     | PTX3         | pentraxin 3, long                                                                         | 2.8    |
| 7897449     | SPSB1        | splA                                                                                      | 2.8    |
| 7981346     | MOK          | MOK protein kinase                                                                        | 2.8    |
| 8157153     | PALM2-AKAP2  | PALM2-AKAP2 readthrough                                                                   | 2.8    |
| 7947358     | TPT1-AS1     | TPT1 antisense RNA 1 (non-protein coding)                                                 | 2.8    |
| 8045210     | CYP4F43P     | cytochrome P450, family 4, subfamily F, polypeptide 43, pseudogene                        | 2.8    |
| 8151931     | TSPYL5       | TSPY-like 5                                                                               | 2.8    |
| 8079131     | FAM198A      | family with sequence similarity 198, member A                                             | 2.8    |
| 7925561     | HNRNPU-AS1   | HNRNPU antisense RNA 1 (non-protein coding)                                               | 2.8    |
| 8005225     | USP32P1      | ubiquitin specific peptidase 32 pseudogene 1                                              | 2.7    |
| 8175217     | GPC4         | glypican 4                                                                                | 2.7    |
| 7950391     | PGM2L1       | phosphoglucomutase 2-like 1                                                               | 2.7    |
| 8173217     | ARHGEF9      | Cdc42 guanine nucleotide exchange factor (GEF) 9                                          | 2.7    |
| 7975416     | PCNX         | pecanex homolog (Drosophila)                                                              | 2.7    |
| 8055016     | AF234262     | Homo sapiens IL-1beta-regulated neutrophil survival protein mRNA, complete cds.           | 2.7    |
| 8143663     | EZH2         | enhancer of zeste homolog 2 (Drosophila)                                                  | 2.7    |
| 7994058     | SCNN1G       | sodium channel, non-voltage-gated 1, gamma subunit                                        | 2.7    |
| 8013262     | USP32P2      | ubiquitin specific peptidase 32 pseudogene 2                                              | 2.7    |
| 8108720     | PCDHB9       | protocadherin beta 9                                                                      | 2.7    |
| 7923453     | KDM5B        | lysine (K)-specific demethylase 5B                                                        | 2.7    |
| 7951159     | RN5S346      | RNA, 5S ribosomal 346                                                                     | 2.7    |
| 8132318     | ANLN         | anillin, actin binding protein                                                            | 2.7    |
| 8161632     | PTAR1        | protein prenyltransferase alpha subunit repeat containing 1                               | 2.7    |
| 8141490     | PMS2P1       | postmeiotic segregation increased 2 pseudogene 1                                          | 2.7    |
| 7917676     | GLMN         | glomulin, FKBP associated protein                                                         | 2.7    |
| 8177834     | ATAT1        | alpha tubulin acetyltransferase 1                                                         | 2.7    |
| 8001099     | HERC2        | HECT and RLD domain containing E3 ubiquitin protein ligase 2                              | 2.7    |
| 7902441     | ST6GALNAC5   | ST6 (alpha-N-acetyl-neuraminy-2,3-beta-galactosyl-1,3)-N-acetylgalactosaminide alpha-2,6- | 2.7    |

| probeset_id | Symbol       | Gene_Name                                                                      | FC_T/N |
|-------------|--------------|--------------------------------------------------------------------------------|--------|
| 8122202     | MYB          | v-myb myeloblastosis viral oncogene homolog (avian)                            | 17.8   |
| 7896754     | LOC100287497 | uncharacterized LOC100287497                                                   | 2.7    |
| 8134789     | PILRB        | paired immunoglobulin-like type 2 receptor beta                                | 2.7    |
| 8035782     | ZNF682       | zinc finger protein 682                                                        | 2.7    |
| 8118890     | SCUBE3       | signal peptide, CUB domain, EGF-like 3                                         | 2.7    |
| 7950042     | SHANK2       | SH3 and multiple ankyrin repeat domains 2                                      | 2.7    |
| 7917649     | TGFBR3       | transforming growth factor, beta receptor III                                  | 2.7    |
| 7948904     | SNORD28      | small nucleolar RNA, C                                                         | 2.7    |
| 7951036     | TAF1D        | TATA box binding protein (TBP)-associated factor, RNA polymerase I, D, 41kDa   | 2.7    |
| 7991224     | HAPLN3       | hyaluronan and proteoglycan link protein 3                                     | 2.6    |
| 8123446     | SMOC2        | SPARC related modular calcium binding 2                                        | 2.6    |
| 8144036     | XRCC2        | X-ray repair complementing defective repair in Chinese hamster cells 2         | 2.6    |
| 8130891     | WDR27        | WD repeat domain 27                                                            | 2.6    |
| 7903404     | RNPC3        | RNA-binding region (RNP1, RRM) containing 3                                    | 2.6    |
| 8133914     | DMTF1        | cyclin D binding myb-like transcription factor 1                               | 2.6    |
| 8104141     | PLEKHG4B     | pleckstrin homology domain containing, family G (with RhoGef domain) member 4B | 2.6    |
| 7970624     | CENPJ        | centromere protein J                                                           | 2.6    |
| 8090152     | ROPN1B       | rhopilin associated tail protein 1B                                            | 2.6    |
| 8043114     | TCF7L1       | transcription factor 7-like 1 (T-cell specific, HMG-box)                       | 2.6    |
| 7961281     | TAS2R50      | taste receptor, type 2, member 50                                              | 2.6    |
| 8139832     | ZNF117       | zinc finger protein 117                                                        | 2.6    |
| 7972003     | KLF12        | Kruppel-like factor 12                                                         | 2.6    |
| 8088636     | LOC100508226 | HHSL751                                                                        | 2.6    |
| 8074780     | YPEL1        | yippee-like 1 (Drosophila)                                                     | 2.6    |
| 7945663     | IFITM10      | interferon induced transmembrane protein 10                                    | 2.6    |
| 8046380     | ITGA6        | integrin, alpha 6                                                              | 2.6    |
| 8031857     | ZNF135       | zinc finger protein 135                                                        | 2.6    |
| 7951133     | MAML2        | mastermind-like 2 (Drosophila)                                                 | 2.6    |
| 8091600     | PLCH1        | phospholipase C, eta 1                                                         | 2.6    |
| 8076113     | FAM227A      | family with sequence similarity 227, member A                                  | 2.6    |
| 7937772     | IGF2         | insulin-like growth factor 2 (somatomedin A)                                   | 2.6    |
| 8069574     | C21orf91     | chromosome 21 open reading frame 91                                            | 2.6    |
| 7902977     | KIAA1107     | KIAA1107                                                                       | 2.6    |
| 7936734     | FGFR2        | fibroblast growth factor receptor 2                                            | 2.6    |
| 7943369     | TMEM133      | transmembrane protein 133                                                      | 2.6    |
| 7939374     | AF274942     | Homo sapiens PNAS-17 mRNA, complete cds.                                       | 2.6    |
| 8156905     | TMEFF1       | transmembrane protein with EGF-like and two follistatin-like domains 1         | 2.6    |
| 7933263     | PTPN20A      | protein tyrosine phosphatase, non-receptor type 20A                            | 2.6    |
| 8001423     | RPGRIP1L     | RPGRIP1-like                                                                   | 2.6    |
| 8155192     | GLIPR2       | GLI pathogenesis-related 2                                                     | 2.6    |
| 8115196     | ZNF300       | zinc finger protein 300                                                        | 2.6    |
| 8154394     | SNAPC3       | small nuclear RNA activating complex, polypeptide 3, 50kDa                     | 2.6    |
| 8102232     | LEF1         | lymphoid enhancer-binding factor 1                                             | 2.6    |

| probeset_id | Symbol       | Gene_Name                                                                           | FC_T/N |
|-------------|--------------|-------------------------------------------------------------------------------------|--------|
| 8122202     | MYB          | v-myb myeloblastosis viral oncogene homolog (avian)                                 | 17.8   |
| 8104131     | MGC39584     | uncharacterized LOC441058                                                           | 2.6    |
| 8114970     | C5orf46      | chromosome 5 open reading frame 46                                                  | 2.6    |
| 8127932     | TBX18        | T-box 18                                                                            | 2.6    |
| 8021442     | ZNF532       | zinc finger protein 532                                                             | 2.5    |
| 8074925     | GUSBP11      | glucuronidase, beta pseudogene 11                                                   | 2.5    |
| 8117165     | SOX4         | SRY (sex determining region Y)-box 4                                                | 2.5    |
| 7961339     | LRP6         | low density lipoprotein receptor-related protein 6                                  | 2.5    |
| 7902891     | ZNF326       | zinc finger protein 326                                                             | 2.5    |
| 7953981     | ETV6         | ets variant 6                                                                       | 2.5    |
| 8143188     | CREB3L2      | cAMP responsive element binding protein 3-like 2                                    | 2.5    |
| 8095080     | PDGFRA       | platelet-derived growth factor receptor, alpha polypeptide                          | 2.5    |
| 8169949     | MST4         | serine                                                                              | 2.5    |
| 7910618     | SLC35F3      | solute carrier family 35, member F3                                                 | 2.5    |
| 8012257     | TP53         | tumor protein p53                                                                   | 2.5    |
| 8105144     | AK001108     | Homo sapiens cDNA FLJ10246 fis, clone HEMBB1000673.                                 | 2.5    |
| 8082767     | TMEM108      | transmembrane protein 108                                                           | 2.5    |
| 8094574     | TBC1D1       | TBC1 (tre-2)                                                                        | 2.5    |
| 7985560     | CSPG4P5      | chondroitin sulfate proteoglycan 4 pseudogene 5                                     | 2.5    |
| 8018114     | SDK2         | sidekick cell adhesion molecule 2                                                   | 2.5    |
| 8156164     | KIF27        | kinesin family member 27                                                            | 2.5    |
| 8105663     | NLN          | neurolysin (metallopeptidase M3 family)                                             | 2.5    |
| 7924712     | LIN9         | lin-9 homolog (C. elegans)                                                          | 2.5    |
| 8112615     | ENC1         | ectodermal-neural cortex 1 (with BTB-like domain)                                   | 2.5    |
| 7991598     | SNRPA1       | small nuclear ribonucleoprotein polypeptide A'                                      | 2.5    |
| 8000687     | LOC595101    | smg-1 homolog, phosphatidylinositol 3-kinase-related kinase (C. elegans) pseudogene | 2.5    |
| 7903407     | AMY2B        | amylase, alpha 2B (pancreatic)                                                      | 2.5    |
| 8047097     | GLS          | glutaminase                                                                         | 2.5    |
| 8008493     | LUC7L3       | LUC7-like 3 (S. cerevisiae)                                                         | 2.5    |
| 8028194     | ZNF382       | zinc finger protein 382                                                             | 2.5    |
| 7950082     | LOC100133315 | transient receptor potential cation channel, subfamily C, member 2-like             | 2.5    |
| 7960143     | ZNF84        | zinc finger protein 84                                                              | 2.5    |
| 8000823     | SMG1         | smg-1 homolog, phosphatidylinositol 3-kinase-related kinase (C. elegans)            | 2.5    |
| 8084739     | FLJ42393     | uncharacterized LOC401105                                                           | 2.5    |
| 8104139     | LOC389834    | ankyrin repeat domain 57 pseudogene                                                 | 2.5    |
| 7905918     | EFNA3        | ephrin-A3                                                                           | 2.5    |
| 8136647     | TAS2R5       | taste receptor, type 2, member 5                                                    | 2.5    |
| 8012475     | MYH10        | myosin, heavy chain 10, non-muscle                                                  | 2.5    |
| 8123864     | TFAP2A       | transcription factor AP-2 alpha (activating enhancer binding protein 2 alpha)       | 2.5    |
| 7972888     | PCID2        | PCI domain containing 2                                                             | 2.5    |
| 8005765     | WSB1         | WD repeat and SOCS box containing 1                                                 | 2.5    |
| 8022612     | ZNF521       | zinc finger protein 521                                                             | 2.5    |
| 8056047     | WDSUB1       | WD repeat, sterile alpha motif and U-box domain containing 1                        | 2.5    |

| probeset_id | Symbol       | Gene_Name                                                                           | FC_T/N |
|-------------|--------------|-------------------------------------------------------------------------------------|--------|
| 8122202     | MYB          | v-myb myeloblastosis viral oncogene homolog (avian)                                 | 17.8   |
| 7969736     | FARP1        | FERM, RhoGEF (ARHGEF) and pleckstrin domain protein 1 (chondrocyte-derived)         | 2.5    |
| 7946326     | OR5P3        | olfactory receptor, family 5, subfamily P, member 3                                 | 2.5    |
| 7993999     | LOC100271836 | smg-1 homolog, phosphatidylinositol 3-kinase-related kinase (C. elegans) pseudogene | 2.4    |
| 8000834     | LOC440354    | smg-1 homolog, phosphatidylinositol 3-kinase-related kinase (C. elegans) pseudogene | 2.4    |
| 7961757     | ST8SIA1      | ST8 alpha-N-acetyl-neuraminide alpha-2,8-sialyltransferase 1                        | 2.4    |
| 7961540     | RERG         | RAS-like, estrogen-regulated, growth inhibitor                                      | 2.4    |
| 8099259     | AFAP1        | actin filament associated protein 1                                                 | 2.4    |
| 8058390     | RAPH1        | Ras association (RalGDS                                                             | 2.4    |
| 8096875     | ENPEP        | glutamyl aminopeptidase (aminopeptidase A)                                          | 2.4    |
| 7961279     | TAS2R14      | taste receptor, type 2, member 14                                                   | 2.4    |
| 8000156     | SMG1P1       | smg-1 homolog, phosphatidylinositol 3-kinase-related kinase pseudogene 1            | 2.4    |
| 7983638     | DTWD1        | DTW domain containing 1                                                             | 2.4    |
| 8097058     | CEP170P1     | centrosomal protein 170kDa pseudogene 1                                             | 2.4    |
| 8104568     | LOC100133299 | GALI1870                                                                            | 2.4    |
| 8170420     | MAMLD1       | mastermind-like domain containing 1                                                 | 2.4    |
| 8147079     | LRRCC1       | leucine rich repeat and coiled-coil centrosomal protein 1                           | 2.4    |
| 8027241     | ZNF253       | zinc finger protein 253                                                             | 2.4    |
| 7986701     | HERC2P2      | hect domain and RLD 2 pseudogene 2                                                  | 2.4    |
| 8122773     | MTHFD1L      | methylenetetrahydrofolate dehydrogenase (NADP+ dependent) 1-like                    | 2.4    |
| 7986383     | IGF1R        | insulin-like growth factor 1 receptor                                               | 2.4    |
| 8071061     | TPTEP1       | transmembrane phosphatase with tensin homology pseudogene 1                         | 2.4    |
| 8123520     | LINC00266-1  | long intergenic non-protein coding RNA 266-1                                        | 2.4    |
| 7991777     | C4orf46      | chromosome 4 open reading frame 46                                                  | 2.4    |
| 7947189     | CCDC34       | coiled-coil domain containing 34                                                    | 2.4    |
| 8035847     | ZNF675       | zinc finger protein 675                                                             | 2.4    |
| 7925691     | ZNF124       | zinc finger protein 124                                                             | 2.4    |
| 8017262     | BRIP1        | BRCA1 interacting protein C-terminal helicase 1                                     | 2.4    |
| 7991047     | LOC100131860 | uncharacterized LOC100131860                                                        | 2.4    |
| 8174119     | ZMAT1        | zinc finger, matrin-type 1                                                          | 2.4    |
| 7908347     | OCLM         | oculomedin                                                                          | 2.4    |
| 7927876     | TET1         | tet methylcytosine dioxygenase 1                                                    | 2.4    |
| 7970329     | GAS6         | growth arrest-specific 6                                                            | 2.4    |
| 8147101     | E2F5         | E2F transcription factor 5, p130-binding                                            | 2.4    |
| 7998174     | LUC7L        | LUC7-like (S. cerevisiae)                                                           | 2.4    |
| 7978997     | MAP4K5       | mitogen-activated protein kinase kinase kinase kinase 5                             | 2.4    |
| 8103644     | AB062480     | Homo sapiens OK                                                                     | 2.4    |
| 8135585     | AY143171     | Homo sapiens testin-related protein TRG mRNA, complete cds.                         | 2.4    |
| 8036324     | ZNF260       | zinc finger protein 260                                                             | 2.4    |
| 8052399     | BCL11A       | B-cell CLL                                                                          | 2.4    |
| 7965486     | CCDC41       | coiled-coil domain containing 41                                                    | 2.4    |
| 8062623     | PLCG1        | phospholipase C, gamma 1                                                            | 2.4    |
| 8136347     | CALD1        | caldesmon 1                                                                         | 2.4    |

| probeset_id | Symbol       | Gene_Name                                                                    | FC_T/N |
|-------------|--------------|------------------------------------------------------------------------------|--------|
| 8122202     | MYB          | v-myb myeloblastosis viral oncogene homolog (avian)                          | 17.8   |
| 8170648     | BGN          | biglycan                                                                     | 2.4    |
| 7962112     | CAPRIN2      | caprin family member 2                                                       | 2.4    |
| 7951144     | CCDC82       | coiled-coil domain containing 82                                             | 2.4    |
| 8089701     | ZBTB20       | zinc finger and BTB domain containing 20                                     | 2.4    |
| 8016789     | MBTD1        | mbt domain containing 1                                                      | 2.4    |
| 7954717     | BICD1        | bicaudal D homolog 1 (Drosophila)                                            | 2.4    |
| 7961287     | TAS2R19      | taste receptor, type 2, member 19                                            | 2.4    |
| 8079079     | NKTR         | natural killer-tumor recognition sequence                                    | 2.4    |
| 7901993     | CACHD1       | cache domain containing 1                                                    | 2.4    |
| 8139840     | ERV3-1       | endogenous retrovirus group 3, member 1                                      | 2.4    |
| 8084219     | KLHL24       | kelch-like 24 (Drosophila)                                                   | 2.4    |
| 8038347     | TEAD2        | TEA domain family member 2                                                   | 2.4    |
| 7916969     | ZRANB2       | zinc finger, RAN-binding domain containing 2                                 | 2.3    |
| 8093332     | ZNF876P      | zinc finger protein 876, pseudogene                                          | 2.3    |
| 8109938     | RANBP17      | RAN binding protein 17                                                       | 2.3    |
| 8137670     | PDGFA        | platelet-derived growth factor alpha polypeptide                             | 2.3    |
| 8147112     | CA13         | carbonic anhydrase XIII                                                      | 2.3    |
| 8066347     | PTPRT        | protein tyrosine phosphatase, receptor type, T                               | 2.3    |
| 8178059     | LY6G5B       | lymphocyte antigen 6 complex, locus G5B                                      | 2.3    |
| 8022320     | NPIPL2       | nuclear pore complex interacting protein-like 2                              | 2.3    |
| 7972682     | KDEL1        | KDEL (Lys-Asp-Glu-Leu) containing 1                                          | 2.3    |
| 8108716     | PCDHB16      | protocadherin beta 16                                                        | 2.3    |
| 7932132     | FRMD4A       | FERM domain containing 4A                                                    | 2.3    |
| 8047174     | SLC39A10     | solute carrier family 39 (zinc transporter), member 10                       | 2.3    |
| 8176865     | PCMTD2       | protein-L-isoaspartate (D-aspartate) O-methyltransferase domain containing 2 | 2.3    |
| 8009255     | CEP95        | centrosomal protein 95kDa                                                    | 2.3    |
| 7918925     | TRIM45       | tripartite motif containing 45                                               | 2.3    |
| 8120271     | FBXO9        | F-box protein 9                                                              | 2.3    |
| 8152703     | FBXO32       | F-box protein 32                                                             | 2.3    |
| 7943160     | SCARNA9L     | small Cajal body-specific RNA 9-like                                         | 2.3    |
| 8027368     | ZNF254       | zinc finger protein 254                                                      | 2.3    |
| 8147313     | TMEM67       | transmembrane protein 67                                                     | 2.3    |
| 8128394     | PNISR        | PNN-interacting serine                                                       | 2.3    |
| 8052598     | WDPCP        | WD repeat containing planar cell polarity effector                           | 2.3    |
| 8135211     | FAM185A      | family with sequence similarity 185, member A                                | 2.3    |
| 7945864     | ZNF195       | zinc finger protein 195                                                      | 2.3    |
| 7922402     | GAS5         | growth arrest-specific 5 (non-protein coding)                                | 2.3    |
| 7997239     | LOC100507607 | nuclear pore complex-interacting protein-like 2-like                         | 2.3    |
| 8064637     | C20orf194    | chromosome 20 open reading frame 194                                         | 2.3    |
| 7973056     | APEX1        | APEX nuclease (multifunctional DNA repair enzyme) 1                          | 2.3    |
| 8094476     | TBC1D19      | TBC1 domain family, member 19                                                | 2.3    |
| 8112560     | SMA5         | glucuronidase, beta pseudogene                                               | 2.3    |

| probeset_id | Symbol       | Gene_Name                                                     | FC_T/N |
|-------------|--------------|---------------------------------------------------------------|--------|
| 8122202     | MYB          | v-myb myeloblastosis viral oncogene homolog (avian)           | 17.8   |
| 8053315     | LRRTM4       | leucine rich repeat transmembrane neuronal 4                  | 2.3    |
| 8099612     | GPR125       | G protein-coupled receptor 125                                | 2.3    |
| 8037762     | CCDC8        | coiled-coil domain containing 8                               | 2.3    |
| 8084232     | YEATS2       | YEATS domain containing 2                                     | 2.3    |
| 8105991     | SMA4         | glucuronidase, beta pseudogene                                | 2.3    |
| 8082165     | KALRN        | kalirin, RhoGEF kinase                                        | 2.3    |
| 8072705     | RASD2        | RASD family, member 2                                         | 2.3    |
| 8088560     | ADAMTS9      | ADAM metallopeptidase with thrombospondin type 1 motif, 9     | 2.3    |
| 8170179     | VGLL1        | vestigial like 1 (Drosophila)                                 | 2.3    |
| 8119423     | ADCY10P1     | adenylate cyclase 10 (soluble) pseudogene 1                   | 2.3    |
| 7930537     | TCF7L2       | transcription factor 7-like 2 (T-cell specific, HMG-box)      | 2.3    |
| 8153262     | SLC45A4      | solute carrier family 45, member 4                            | 2.3    |
| 7981943     | SNORD64      | small nucleolar RNA, C                                        | 2.3    |
| 8148317     | MYC          | v-myc myelocytomatosis viral oncogene homolog (avian)         | 2.3    |
| 7896744     | OR4F3        | olfactory receptor, family 4, subfamily F, member 3           | 2.3    |
| 8091550     | KIAA1328     | KIAA1328                                                      | 2.3    |
| 8166104     | OFD1         | oral-facial-digital syndrome 1                                | 2.3    |
| 8155591     | ANKRD20A8P   | ankyrin repeat domain 20 family, member A8, pseudogene        | 2.3    |
| 7915787     | PIK3R3       | phosphoinositide-3-kinase, regulatory subunit 3 (gamma)       | 2.3    |
| 7993580     | PKD1P1       | polycystic kidney disease 1 (autosomal dominant) pseudogene 1 | 2.3    |
| 8159876     | RFX3         | regulatory factor X, 3 (influences HLA class II expression)   | 2.3    |
| 7994026     | LOC100132247 | nuclear pore complex interacting protein related gene         | 2.3    |
| 8104621     | GUSBP1       | glucuronidase, beta pseudogene 1                              | 2.3    |
| 8009040     | MRC2         | mannose receptor, C type 2                                    | 2.3    |
| 8117395     | HIST1H2BF    | histone cluster 1, H2bf                                       | 2.3    |
| 8045736     | FMNL2        | formin-like 2                                                 | 2.3    |
| 8171493     | CTPS2        | CTP synthase 2                                                | 2.3    |
| 8136641     | TAS2R3       | taste receptor, type 2, member 3                              | 2.3    |
| 8110478     | ZNF454       | zinc finger protein 454                                       | 2.3    |
| 8102532     | PDE5A        | phosphodiesterase 5A, cGMP-specific                           | 2.3    |
| 7909568     | DTL          | denticleless E3 ubiquitin protein ligase homolog (Drosophila) | 2.3    |
| 8112376     | CENPK        | centromere protein K                                          | 2.3    |
| 8160138     | NFIB         | nuclear factor 1                                              | 2.2    |
| 8140709     | KIAA1324L    | KIAA1324-like                                                 | 2.2    |
| 8145611     | FZD3         | frizzled family receptor 3                                    | 2.2    |
| 8132917     | ZNF713       | zinc finger protein 713                                       | 2.2    |
| 7920852     | KIAA0907     | KIAA0907                                                      | 2.2    |
| 8035813     | ZNF43        | zinc finger protein 43                                        | 2.2    |
| 8048171     | PKI55        | DKFZp434H1419                                                 | 2.2    |
| 8041813     | CRIPT        | cysteine-rich PDZ-binding protein                             | 2.2    |
| 8047738     | NRP2         | neuropilin 2                                                  | 2.2    |
| 8046461     | ZAK          | sterile alpha motif and leucine zipper containing kinase AZK  | 2.2    |

| probeset_id | Symbol    | Gene_Name                                                                                | FC_T/N |
|-------------|-----------|------------------------------------------------------------------------------------------|--------|
| 8122202     | MYB       | v-myb myeloblastosis viral oncogene homolog (avian)                                      | 17.8   |
| 7900051     | EIF2C3    | eukaryotic translation initiation factor 2C, 3                                           | 2.2    |
| 7943442     | DYNC2H1   | dynein, cytoplasmic 2, heavy chain 1                                                     | 2.2    |
| 8060736     | BC008667  | Homo sapiens cDNA clone MGC:17708 IMAGE:3868595, complete cds.                           | 2.2    |
| 8130071     | C15orf29  | chromosome 15 open reading frame 29                                                      | 2.2    |
| 7974341     | GNG2      | guanine nucleotide binding protein (G protein), gamma 2                                  | 2.2    |
| 8141882     | DPY19L2P2 | dpy-19-like 2 pseudogene 2 (C. elegans)                                                  | 2.2    |
| 7932433     | NSUN6     | NOP2                                                                                     | 2.2    |
| 8111153     | MYO10     | myosin X                                                                                 | 2.2    |
| 8048381     | STK36     | serine                                                                                   | 2.2    |
| 7934706     | AF130084  | Homo sapiens clone FLB8310 PRO2225 mRNA, complete cds.                                   | 2.2    |
| 7933877     | JMJD1C    | jumonji domain containing 1C                                                             | 2.2    |
| 7967210     | LOC338799 | uncharacterized LOC338799                                                                | 2.2    |
| 7985053     | FBXO22    | F-box protein 22                                                                         | 2.2    |
| 8087201     | IP6K2     | inositol hexakisphosphate kinase 2                                                       | 2.2    |
| 8124531     | HIST1H3I  | histone cluster 1, H3i                                                                   | 2.2    |
| 8148966     | RPL23AP53 | ribosomal protein L23a pseudogene 53                                                     | 2.2    |
| 7902127     | SGIP1     | SH3-domain GRB2-like (endophilin) interacting protein 1                                  | 2.2    |
| 8069178     | ADARB1    | adenosine deaminase, RNA-specific, B1                                                    | 2.2    |
| 8050497     | OSR1      | odd-skipped related 1 (Drosophila)                                                       | 2.2    |
| 8022295     | PIEZO2    | piezo-type mechanosensitive ion channel component 2                                      | 2.2    |
| 8037767     | PNMAL1    | paraneoplastic Ma antigen family-like 1                                                  | 2.2    |
| 8132118     | AQP1      | aquaporin 1 (Colton blood group)                                                         | 2.2    |
| 7957008     | CPSF6     | cleavage and polyadenylation specific factor 6, 68kDa                                    | 2.2    |
| 7925904     | AKR1E2    | aldo-keto reductase family 1, member E2                                                  | 2.2    |
| 7927353     | AGAP9     | ArfGAP with GTPase domain, ankyrin repeat and PH domain 9                                | 2.2    |
| 8118322     | SNORD52   | small nucleolar RNA, C                                                                   | 2.2    |
| 7987248     | GOLGA8A   | golgin A8 family, member A                                                               | 2.2    |
| 8095545     | RUFY3     | RUN and FYVE domain containing 3                                                         | 2.2    |
| 8069644     | APP       | amyloid beta (A4) precursor protein                                                      | 2.2    |
| 7933092     | ZNF248    | zinc finger protein 248                                                                  | 2.2    |
| 8102171     | TBCK      | TBC1 domain containing kinase                                                            | 2.2    |
| 7972369     | UGGT2     | UDP-glucose glycoprotein glucosyltransferase 2                                           | 2.2    |
| 7942596     | SERPINH1  | serpin peptidase inhibitor, clade H (heat shock protein 47), member 1, (collagen binding | 2.2    |
| 8092251     | GNB4      | guanine nucleotide binding protein (G protein), beta polypeptide 4                       | 2.2    |
| 8161575     | CBWD5     | COBW domain containing 5                                                                 | 2.2    |
| 7953765     | RIMKLB    | ribosomal modification protein rimK-like family member B                                 | 2.2    |
| 7943349     | ARHGAP42  | Rho GTPase activating protein 42                                                         | 2.2    |
| 7930559     | AK027209  | Homo sapiens cDNA: FLJ23556 fis, clone LNG09443.                                         | 2.2    |
| 7917976     | SASS6     | spindle assembly 6 homolog (C. elegans)                                                  | 2.2    |
| 7934411     | USP54     | ubiquitin specific peptidase 54                                                          | 2.2    |
| 7921916     | RGS5      | regulator of G-protein signaling 5                                                       | 2.2    |
| 8147503     | LAPTM4B   | lysosomal protein transmembrane 4 beta                                                   | 2.2    |

| probeset_id | Symbol       | Gene_Name                                                                        | FC_T/N |
|-------------|--------------|----------------------------------------------------------------------------------|--------|
| 8122202     | MYB          | v-myb myeloblastosis viral oncogene homolog (avian)                              | 17.8   |
| 8001800     | CDH11        | cadherin 11, type 2, OB-cadherin (osteoblast)                                    | 2.2    |
| 7961249     | TAS2R10      | taste receptor, type 2, member 10                                                | 2.2    |
| 8108954     | TCERG1       | transcription elongation regulator 1                                             | 2.2    |
| 8005839     | TMEM97       | transmembrane protein 97                                                         | 2.2    |
| 8086908     | PLXNB1       | plexin B1                                                                        | 2.2    |
| 8154416     | CCDC171      | coiled-coil domain containing 171                                                | 2.2    |
| 8166355     | CNKSR2       | connector enhancer of kinase suppressor of Ras 2                                 | 2.2    |
| 7932390     | TRDMT1       | tRNA aspartic acid methyltransferase 1                                           | 2.2    |
| 8120335     | FAM83B       | family with sequence similarity 83, member B                                     | 2.2    |
| 7920000     | POGZ         | pogo transposable element with ZNF domain                                        | 2.2    |
| 7897803     | PLOD1        | procollagen-lysine, 2-oxoglutarate 5-dioxygenase 1                               | 2.2    |
| 7910915     | CHRM3        | cholinergic receptor, muscarinic 3                                               | 2.2    |
| 8118228     | CSNK2B       | casein kinase 2, beta polypeptide                                                | 2.2    |
| 8038967     | ZNF83        | zinc finger protein 83                                                           | 2.2    |
| 8111339     | MTMR12       | myotubularin related protein 12                                                  | 2.2    |
| 7960947     | A2M          | alpha-2-macroglobulin                                                            | 2.2    |
| 8178090     | C6orf48      | chromosome 6 open reading frame 48                                               | 2.2    |
| 8085145     | RAD18        | RAD18 homolog (S. cerevisiae)                                                    | 2.2    |
| 7977472     | OR11H12      | olfactory receptor, family 11, subfamily H, member 12                            | 2.2    |
| 8124691     | HCG8         | HLA complex group 8                                                              | 2.2    |
| 8126710     | SUPT3H       | suppressor of Ty 3 homolog (S. cerevisiae)                                       | 2.2    |
| 8162490     | HIATL1       | hippocampus abundant transcript-like 1                                           | 2.2    |
| 7925500     | CHML         | choroideremia-like (Rab escort protein 2)                                        | 2.2    |
| 8028186     | ZNF146       | zinc finger protein 146                                                          | 2.1    |
| 7951046     | MRE11A       | MRE11 meiotic recombination 11 homolog A (S. cerevisiae)                         | 2.1    |
| 8000205     | NPIPL3       | nuclear pore complex interacting protein-like 3                                  | 2.1    |
| 8066254     | LOC388796    | uncharacterized LOC388796                                                        | 2.1    |
| 8166511     | PDK3         | pyruvate dehydrogenase kinase, isozyme 3                                         | 2.1    |
| 8040985     | ZNF512       | zinc finger protein 512                                                          | 2.1    |
| 7923426     | UBE2T        | ubiquitin-conjugating enzyme E2T (putative)                                      | 2.1    |
| 7999614     | LOC399491    | GPS, PLAT and transmembrane domain-containing protein                            | 2.1    |
| 8169419     | ALG13        | asparagine-linked glycosylation 13 homolog (S. cerevisiae)                       | 2.1    |
| 8020308     | C18orf1      | chromosome 18 open reading frame 1                                               | 2.1    |
| 8122365     | GPR126       | G protein-coupled receptor 126                                                   | 2.1    |
| 7905909     | EFNA4        | ephrin-A4                                                                        | 2.1    |
| 8070194     | RUNX1        | runt-related transcription factor 1                                              | 2.1    |
| 8015607     | STAT3        | signal transducer and activator of transcription 3 (acute-phase response factor) | 2.1    |
| 7933139     | ZNF33B       | zinc finger protein 33B                                                          | 2.1    |
| 8048014     | RPE          | ribulose-5-phosphate-3-epimerase                                                 | 2.1    |
| 8058477     | KLF7         | Kruppel-like factor 7 (ubiquitous)                                               | 2.1    |
| 8010078     | LOC100507246 | uncharacterized LOC100507246                                                     | 2.1    |
| 7922408     | SNORD78      | small nucleolar RNA, C                                                           | 2.1    |



| probeset_id | Symbol        | Gene_Name                                                                  | FC_T/N |
|-------------|---------------|----------------------------------------------------------------------------|--------|
| 8122202     | MYB           | v-myb myeloblastosis viral oncogene homolog (avian)                        | 17.8   |
| 8021181     | SCARNA17      | small Cajal body-specific RNA 17                                           | 2.1    |
| 7994565     | RRN3P2        | RNA polymerase I transcription factor homolog (S. cerevisiae) pseudogene 2 | 2.1    |
| 8093453     | FLJ35816      | FLJ35816 protein                                                           | 2.1    |
| 8015526     | KAT2A         | K(lysine) acetyltransferase 2A                                             | 2.1    |
| 7987369     | ATPBD4        | ATP binding domain 4                                                       | 2.1    |
| 7943690     | DDX10         | DEAD (Asp-Glu-Ala-Asp) box polypeptide 10                                  | 2.1    |
| 8158998     | RPL7A         | ribosomal protein L7a                                                      | 2.1    |
| 8039593     | ZNF667        | zinc finger protein 667                                                    | 2.1    |
| 7965523     | NR2C1         | nuclear receptor subfamily 2, group C, member 1                            | 2.1    |
| 8137474     | ACTR3B        | ARP3 actin-related protein 3 homolog B (yeast)                             | 2.1    |
| 8094342     | PACRGL        | PARK2 co-regulated-like                                                    | 2.1    |
| 8035803     | ZNF708        | zinc finger protein 708                                                    | 2.1    |
| 7933413     | BMS1P5        | BMS1 pseudogene 5                                                          | 2.1    |
| 7969204     | WDFY2         | WD repeat and FYVE domain containing 2                                     | 2.1    |
| 8057045     | FKBP7         | FK506 binding protein 7                                                    | 2.1    |
| 7902883     | LRRC8D        | leucine rich repeat containing 8 family, member D                          | 2.1    |
| 8025488     | ZNF559-ZNF177 | ZNF559-ZNF177 readthrough                                                  | 2.1    |
| 8176026     | FLNA          | filamin A, alpha                                                           | 2.1    |
| 8173310     | OPHN1         | oligophrenin 1                                                             | 2.1    |
| 8113433     | EFNA5         | ephrin-A5                                                                  | 2.1    |
| 7920877     | ARHGEF2       | Rho                                                                        | 2.1    |
| 8047577     | ALS2CR8       | amyotrophic lateral sclerosis 2 (juvenile) chromosome region, candidate 8  | 2.1    |
| 7943890     | LOC100132686  | uncharacterized LOC100132686                                               | 2.1    |
| 7918913     | IGSF3         | immunoglobulin superfamily, member 3                                       | 2.1    |
| 7994371     | LOC728741     | uncharacterized LOC728741                                                  | 2.1    |
| 7961960     | RN5S354       | RNA, 5S ribosomal 354                                                      | 2.1    |
| 8068761     | ABCG1         | ATP-binding cassette, sub-family G (WHITE), member 1                       | 2.1    |
| 8162850     | TEX10         | testis expressed 10                                                        | 2.1    |
| 8141625     | EPHB4         | EPH receptor B4                                                            | 2.1    |
| 7959761     | FAM101A       | family with sequence similarity 101, member A                              | 2.1    |
| 8021924     | THOC1         | THO complex 1                                                              | 2.1    |
| 8161373     | Rinn lincRNA  | linc-FAM75A7-2 chr9:-42363047-42367092                                     | 2.1    |
| 8050869     | AY358728      | Homo sapiens clone DNA108758 GNCC2999 (UNQ2999) mRNA, complete cds.        | 2.1    |
| 8111952     | C5orf28       | chromosome 5 open reading frame 28                                         | 2.1    |
| 8133049     | ZNF107        | zinc finger protein 107                                                    | 2.1    |
| 7949956     | MTL5          | metallothionein-like 5, testis-specific (tesmin)                           | 2.1    |
| 8167673     | MAGED4B       | melanoma antigen family D, 4B                                              | 2.1    |
| 8007799     | MGC57346      | uncharacterized LOC401884                                                  | 2.1    |
| 8013015     | CENPV         | centromere protein V                                                       | 2.1    |
| 7933427     | AGAP8         | ArfGAP with GTPase domain, ankyrin repeat and PH domain 8                  | 2.1    |
| 8088264     | IL17RD        | interleukin 17 receptor D                                                  | 2.1    |
| 8088142     | CHDH          | choline dehydrogenase                                                      | 2.1    |

| probeset_id | Symbol       | Gene_Name                                                     | FC_T/N |
|-------------|--------------|---------------------------------------------------------------|--------|
| 8122202     | MYB          | v-myb myeloblastosis viral oncogene homolog (avian)           | 17.8   |
| 7980940     | ATXN3        | ataxin 3                                                      | 2.1    |
| 7993404     | NPIP         | nuclear pore complex interacting protein                      | 2.1    |
| 8023377     | MEX3C        | mex-3 homolog C (C. elegans)                                  | 2.1    |
| 7916024     | TTC39A       | tetratricopeptide repeat domain 39A                           | 2.1    |
| 8108697     | PCDHB5       | protocadherin beta 5                                          | 2.1    |
| 8141872     | NAPEPLD      | N-acyl phosphatidylethanolamine phospholipase D               | 2.1    |
| 8156263     | SPIN1        | spindlin 1                                                    | 2.1    |
| 8090737     | NPHP3        | nephronophthisis 3 (adolescent)                               | 2.1    |
| 7970793     | SLC46A3      | solute carrier family 46, member 3                            | 2.1    |
| 8006237     | LOC400590    | uncharacterized LOC400590                                     | 2.1    |
| 8141371     | GJC3         | gap junction protein, gamma 3, 30.2kDa                        | 2.1    |
| 8161587     | CBWD3        | COBW domain containing 3                                      | 2.1    |
| 8027260     | ZNF486       | zinc finger protein 486                                       | 2.1    |
| 8147221     | OSGIN2       | oxidative stress induced growth inhibitor family member 2     | 2.1    |
| 8133057     | ZNF138       | zinc finger protein 138                                       | 2.1    |
| 7959408     | KNTC1        | kinetochore associated 1                                      | 2.1    |
| 8175432     | RBMX         | RNA binding motif protein, X-linked                           | 2.1    |
| 8160040     | PTPRD        | protein tyrosine phosphatase, receptor type, D                | 2.1    |
| 8131519     | PHF14        | PHD finger protein 14                                         | 2.1    |
| 8166469     | SAT1         | spermidine                                                    | 2.1    |
| 8123155     | PNLDC1       | poly(A)-specific ribonuclease (PARN)-like domain containing 1 | 2.1    |
| 7984569     | LRRC49       | leucine rich repeat containing 49                             | 2.1    |
| 8094134     | LOC728419    | ubiquitin carboxyl-terminal hydrolase 17-like                 | 2.1    |
| 8031992     | LOC100506479 | uncharacterized LOC100506479                                  | 2.1    |
| 8014974     | TOP2A        | topoisomerase (DNA) II alpha 170kDa                           | 2.1    |
| 8056113     | LY75         | lymphocyte antigen 75                                         | 2.1    |
| 7909503     | SERTAD4      | SERTA domain containing 4                                     | 2.1    |
| 8088348     | FAM116A      | family with sequence similarity 116, member A                 | 2.1    |
| 8171297     | MID1         | midline 1 (Opitz)                                             | 2.1    |
| 8161433     | AK091508     | Homo sapiens cDNA FLJ34189 fis, clone FCBBF3017535.           | 2.1    |
| 8119858     | POLH         | polymerase (DNA directed), eta                                | 2.1    |
| 7958000     | CHPT1        | choline phosphotransferase 1                                  | 2.1    |
| 8019737     | KPNA2        | karyopherin alpha 2 (RAG cohort 1, importin alpha 1)          | 2.1    |
| 8052908     | CLEC4F       | C-type lectin domain family 4, member F                       | 2.1    |
| 7899562     | PTPRU        | protein tyrosine phosphatase, receptor type, U                | 2.1    |
| 8169617     | PGRMC1       | progesterone receptor membrane component 1                    | 2.0    |
| 7971039     | FAM48A       | family with sequence similarity 48, member A                  | 2.0    |
| 8139212     | GLI3         | GLI family zinc finger 3                                      | 2.0    |
| 8146717     | SGK3         | serum                                                         | 2.0    |
| 8132439     | C7orf10      | chromosome 7 open reading frame 10                            | 2.0    |
| 8075673     | RBFOX2       | RNA binding protein, fox-1 homolog (C. elegans) 2             | 2.0    |
| 8122099     | ENPP1        | ectonucleotide pyrophosphatase                                | 2.0    |

| probeset_id | Symbol    | Gene_Name                                                            | FC_T/N |
|-------------|-----------|----------------------------------------------------------------------|--------|
| 8122202     | MYB       | v-myb myeloblastosis viral oncogene homolog (avian)                  | 17.8   |
| 7909708     | CENPF     | centromere protein F, 350                                            | 2.0    |
| 8105585     | RNF180    | ring finger protein 180                                              | 2.0    |
| 8070046     | GCFC1     | GC-rich sequence DNA-binding factor 1                                | 2.0    |
| 8027247     | ZNF93     | zinc finger protein 93                                               | 2.0    |
| 8090988     | CEP70     | centrosomal protein 70kDa                                            | 2.0    |
| 8166289     | CDKL5     | cyclin-dependent kinase-like 5                                       | 2.0    |
| 8027304     | ZNF493    | zinc finger protein 493                                              | 2.0    |
| 8047606     | NBEAL1    | neurobeachin-like 1                                                  | 2.0    |
| 8060977     | C20orf94  | chromosome 20 open reading frame 94                                  | 2.0    |
| 8117646     | ZNF192    | zinc finger protein 192                                              | 2.0    |
| 7968274     | PAN3      | PAN3 poly(A) specific ribonuclease subunit homolog (S. cerevisiae)   | 2.0    |
| 7948906     | SNHG1     | small nucleolar RNA host gene 1 (non-protein coding)                 | 2.0    |
| 8165888     | AF118077  | Homo sapiens PRO1808 mRNA, complete cds.                             | 2.0    |
| 7964347     | TMEM194A  | transmembrane protein 194A                                           | 2.0    |
| 8044346     | LOC151009 | uncharacterized LOC151009                                            | 2.0    |
| 7933574     | AGAP4     | ArfGAP with GTPase domain, ankyrin repeat and PH domain 4            | 2.0    |
| 8080714     | FLNB      | filamin B, beta                                                      | 2.0    |
| 8153890     | ZNF251    | zinc finger protein 251                                              | 2.0    |
| 8160559     | DDX58     | DEAD (Asp-Glu-Ala-Asp) box polypeptide 58                            | 2.0    |
| 8129418     | PTPRK     | protein tyrosine phosphatase, receptor type, K                       | 2.0    |
| 8047538     | BMPR2     | bone morphogenetic protein receptor, type II (serine                 | 2.0    |
| 8042601     | ZNF638    | zinc finger protein 638                                              | 2.0    |
| 8096463     | SMARCD1   | SWI                                                                  | 2.0    |
| 8078784     | XYLB      | xylulokinase homolog (H. influenzae)                                 | 2.0    |
| 8059279     | EPHA4     | EPH receptor A4                                                      | 2.0    |
| 8168316     | OGT       | O-linked N-acetylglucosamine (GlcNAc) transferase                    | 2.0    |
| 7917433     | ODF2L     | outer dense fiber of sperm tails 2-like                              | 2.0    |
| 7925978     | FAM208B   | family with sequence similarity 208, member B                        | 2.0    |
| 7904478     | LINC00328 | long intergenic non-protein coding RNA 328                           | 2.0    |
| 8091656     | METTL15   | methyltransferase like 15                                            | 2.0    |
| 8035842     | ZNF91     | zinc finger protein 91                                               | 2.0    |
| 8042195     | AHSA2     | AHA1, activator of heat shock 90kDa protein ATPase homolog 2 (yeast) | 2.0    |
| 8149774     | LOXL2     | lysyl oxidase-like 2                                                 | 2.0    |
| 8142036     | SRPK2     | SRSF protein kinase 2                                                | 2.0    |
| 8167835     | TRO       | trophinin                                                            | 2.0    |
| 7920317     | ILF2      | interleukin enhancer binding factor 2, 45kDa                         | 2.0    |
| 7916185     | ZCCHC11   | zinc finger, CCHC domain containing 11                               | 2.0    |
| 7967091     | SPPL3     | signal peptide peptidase like 3                                      | 2.0    |
| 8066303     | CHD6      | chromodomain helicase DNA binding protein 6                          | 2.0    |
| 8052526     | XPO1      | exportin 1 (CRM1 homolog, yeast)                                     | 2.0    |
| 7926896     | CKS1B     | CDC28 protein kinase regulatory subunit 1B                           | 2.0    |
| 8035779     | ZNF626    | zinc finger protein 626                                              | 2.0    |

| probeset_id | Symbol    | Gene_Name                                                                      | FC_T/N |
|-------------|-----------|--------------------------------------------------------------------------------|--------|
| 8122202     | MYB       | v-myb myeloblastosis viral oncogene homolog (avian)                            | 17.8   |
| 7968800     | DGKH      | diacylglycerol kinase, eta                                                     | 2.0    |
| 7902992     | RPAP2     | RNA polymerase II associated protein 2                                         | 2.0    |
| 8112202     | PLK2      | polo-like kinase 2                                                             | 2.0    |
| 8097262     | SPATA5    | spermatogenesis associated 5                                                   | 2.0    |
| 8041644     | PLEKHH2   | pleckstrin homology domain containing, family H (with MyTH4 domain) member 2   | 2.0    |
| 8086141     | EPM2AIP1  | EPM2A (laforin) interacting protein 1                                          | 2.0    |
| 7928291     | CHST3     | carbohydrate (chondroitin 6) sulfotransferase 3                                | 2.0    |
| 8128522     | HACE1     | HECT domain and ankyrin repeat containing E3 ubiquitin protein ligase 1        | 2.0    |
| 8006170     | LRRC37BP1 | leucine rich repeat containing 37B pseudogene 1                                | 2.0    |
| 7919584     | HIST2H2BF | histone cluster 2, H2bf                                                        | 2.0    |
| 8064322     | C20orf96  | chromosome 20 open reading frame 96                                            | 2.0    |
| 7926189     | SEC61A2   | Sec61 alpha 2 subunit (S. cerevisiae)                                          | 2.0    |
| 8036151     | HSPB6     | heat shock protein, alpha-crystallin-related, B6                               | 0.5    |
| 7947512     | PAMR1     | peptidase domain containing associated with muscle regeneration 1              | 0.5    |
| 8026047     | JUNB      | jun B proto-oncogene                                                           | -2.0   |
| 8002778     | MLKL      | mixed lineage kinase domain-like                                               | -2.0   |
| 8091799     | SPTSSB    | serine palmitoyltransferase, small subunit B                                   | -2.0   |
| 8172425     | SLC38A5   | solute carrier family 38, member 5                                             | -2.0   |
| 8126382     | C6orf132  | chromosome 6 open reading frame 132                                            | -2.0   |
| 7991386     | CIB1      | calcium and integrin binding 1 (calmyrin)                                      | -2.0   |
| 8165496     | TUBB4B    | tubulin, beta 4B class IVb                                                     | -2.0   |
| 8137783     | TMEM184A  | transmembrane protein 184A                                                     | -2.0   |
| 8101874     | ADH1A     | alcohol dehydrogenase 1A (class I), alpha polypeptide                          | -2.0   |
| 7922474     | KIAA0040  | KIAA0040                                                                       | -2.0   |
| 8161745     | RN5S285   | RNA, 5S ribosomal 285                                                          | -2.0   |
| 8028984     | CYP2F1    | cytochrome P450, family 2, subfamily F, polypeptide 1                          | -2.0   |
| 8129837     | IL20RA    | interleukin 20 receptor, alpha                                                 | -2.0   |
| 7901613     | ACOT11    | acyl-CoA thioesterase 11                                                       | -2.0   |
| 8061564     | ID1       | inhibitor of DNA binding 1, dominant negative helix-loop-helix protein         | -2.0   |
| 7965873     | IGF1      | insulin-like growth factor 1 (somatomedin C)                                   | -2.0   |
| 7917875     | F3        | coagulation factor III (thromboplastin, tissue factor)                         | -2.0   |
| 7966779     | NOS1      | nitric oxide synthase 1 (neuronal)                                             | -2.0   |
| 8026877     | SLC5A5    | solute carrier family 5 (sodium iodide symporter), member 5                    | -2.0   |
| 8166784     | TSPAN7    | tetraspanin 7                                                                  | -2.0   |
| 7928882     | C10orf116 | chromosome 10 open reading frame 116                                           | -2.0   |
| 8114612     | CD14      | CD14 molecule                                                                  | -2.0   |
| 7943984     | ZBTB16    | zinc finger and BTB domain containing 16                                       | -2.0   |
| 8005458     | LGALS9C   | lectin, galactoside-binding, soluble, 9C                                       | -2.0   |
| 7962895     | FKBP11    | FK506 binding protein 11, 19 kDa                                               | -2.1   |
| 7920642     | MUC1      | mucin 1, cell surface associated                                               | -2.1   |
| 7968062     | ATP12A    | ATPase, H+                                                                     | -2.1   |
| 8095697     | CXCL1     | chemokine (C-X-C motif) ligand 1 (melanoma growth stimulating activity, alpha) | -2.1   |

| probeset_id | Symbol   | Gene_Name                                                                           | FC_T/N |
|-------------|----------|-------------------------------------------------------------------------------------|--------|
| 8122202     | MYB      | v-myb myeloblastosis viral oncogene homolog (avian)                                 | 17.8   |
| 7912659     | AGMAT    | agmatine ureohydrolase (agmatinase)                                                 | -2.1   |
| 7919600     | TRNAG34P | transfer RNA glycine 34 (anticodon CCC) pseudogene                                  | -2.1   |
| 8030067     | SULT2B1  | sulfotransferase family, cytosolic, 2B, member 1                                    | -2.1   |
| 8148476     | DENND3   | DENN                                                                                | -2.1   |
| 7979241     | BMP4     | bone morphogenetic protein 4                                                        | -2.1   |
| 8013450     | LGALS9   | lectin, galactoside-binding, soluble, 9                                             | -2.1   |
| 8144121     | PTPRN2   | protein tyrosine phosphatase, receptor type, N polypeptide 2                        | -2.1   |
| 8100994     | CXCL2    | chemokine (C-X-C motif) ligand 2                                                    | -2.1   |
| 8106999     | C5orf27  | chromosome 5 open reading frame 27                                                  | -2.1   |
| 7938299     | RN5S330  | RNA, 5S ribosomal 330                                                               | -2.1   |
| 8090823     | SLCO2A1  | solute carrier organic anion transporter family, member 2A1                         | -2.1   |
| 8098414     | SPCS3    | signal peptidase complex subunit 3 homolog (S. cerevisiae)                          | -2.1   |
| 8140463     | FGL2     | fibrinogen-like 2                                                                   | -2.1   |
| 8101622     | TECR     | trans-2,3-enoyl-CoA reductase                                                       | -2.1   |
| 8034202     | RAB3D    | RAB3D, member RAS oncogene family                                                   | -2.1   |
| 8090343     | KLF15    | Kruppel-like factor 15                                                              | -2.1   |
| 8092978     | MUC4     | mucin 4, cell surface associated                                                    | -2.1   |
| 8006123     | CPD      | carboxypeptidase D                                                                  | -2.1   |
| 8122334     | CCRL1    | chemokine (C-C motif) receptor-like 1                                               | -2.1   |
| 8044080     | SLC9A2   | solute carrier family 9, subfamily A (NHE2, cation proton antiporter 2), member 2   | -2.1   |
| 7983360     | B2M      | beta-2-microglobulin                                                                | -2.1   |
| 8115147     | CD74     | CD74 molecule, major histocompatibility complex, class II invariant chain           | -2.1   |
| 7968015     | TNFRSF19 | tumor necrosis factor receptor superfamily, member 19                               | -2.1   |
| 8174513     | CHRD1    | chordin-like 1                                                                      | -2.1   |
| 7971015     | SMAD9    | SMAD family member 9                                                                | -2.1   |
| 7937079     | BNIP3    | BCL2                                                                                | -2.1   |
| 7979473     | DHRS7    | dehydrogenase                                                                       | -2.1   |
| 8013319     | GRAP     | GRB2-related adaptor protein                                                        | -2.1   |
| 7952022     | AMICA1   | adhesion molecule, interacts with CXADR antigen 1                                   | -2.1   |
| 8059177     | TUBA4A   | tubulin, alpha 4a                                                                   | -2.1   |
| 8041781     | EPAS1    | endothelial PAS domain protein 1                                                    | -2.1   |
| 7926786     | APBB1IP  | amyloid beta (A4) precursor protein-binding, family B, member 1 interacting protein | -2.1   |
| 7994769     | CORO1A   | coronin, actin binding protein, 1A                                                  | -2.1   |
| 8114215     | PITX1    | paired-like homeodomain 1                                                           | -2.1   |
| 8038785     | VSIG10L  | V-set and immunoglobulin domain containing 10 like                                  | -2.1   |
| 8077899     | PPARG    | peroxisome proliferator-activated receptor gamma                                    | -2.1   |
| 8000117     | CRYM     | crystallin, mu                                                                      | -2.1   |
| 8156228     | CTSL1    | cathepsin L1                                                                        | -2.1   |
| 8028600     | NCCRP1   | non-specific cytotoxic cell receptor protein 1 homolog (zebrafish)                  | -2.1   |
| 7932765     | MPP7     | membrane protein, palmitoylated 7 (MAGUK p55 subfamily member 7)                    | -2.1   |
| 8002020     | TPPP3    | tubulin polymerization-promoting protein family member 3                            | -2.1   |
| 8092177     | NCEH1    | neutral cholesterol ester hydrolase 1                                               | -2.1   |

| probeset_id | Symbol   | Gene_Name                                                                         | FC_T/N |
|-------------|----------|-----------------------------------------------------------------------------------|--------|
| 8122202     | MYB      | v-myb myeloblastosis viral oncogene homolog (avian)                               | 17.8   |
| 7906777     | FCGR2B   | Fc fragment of IgG, low affinity IIb, receptor (CD32)                             | -2.1   |
| 8096070     | BMP3     | bone morphogenetic protein 3                                                      | -2.1   |
| 7916364     | LDLRAD1  | low density lipoprotein receptor class A domain containing 1                      | -2.1   |
| 8153474     | TSTA3    | tissue specific transplantation antigen P35B                                      | -2.1   |
| 8057599     | TFPI     | tissue factor pathway inhibitor (lipoprotein-associated coagulation inhibitor)    | -2.1   |
| 8179481     | HLA-DRA  | major histocompatibility complex, class II, DR alpha                              | -2.1   |
| 7918457     | KCNA3    | potassium voltage-gated channel, shaker-related subfamily, member 3               | -2.1   |
| 8042696     | SPR      | sepiapterin reductase (7,8-dihydrobiopterin:NADP+ oxidoreductase)                 | -2.1   |
| 8113214     | GLRX     | glutaredoxin (thioltransferase)                                                   | -2.1   |
| 8005097     | HS3ST3B1 | heparan sulfate (glucosamine) 3-O-sulfotransferase 3B1                            | -2.1   |
| 8153959     | DOCK8    | dedicator of cytokinesis 8                                                        | -2.1   |
| 7998233     | TMEM8A   | transmembrane protein 8A                                                          | -2.1   |
| 8092800     | ATP13A4  | ATPase type 13A4                                                                  | -2.1   |
| 8096845     | EGF      | epidermal growth factor                                                           | -2.1   |
| 7905581     | S100A1   | S100 calcium binding protein A1                                                   | -2.1   |
| 7928046     | TSPAN15  | tetraspanin 15                                                                    | -2.1   |
| 8115261     | CCDC69   | coiled-coil domain containing 69                                                  | -2.2   |
| 8152812     | FAM84B   | family with sequence similarity 84, member B                                      | -2.2   |
| 7975268     | ARG2     | arginase, type II                                                                 | -2.2   |
| 7952426     | VSIG2    | V-set and immunoglobulin domain containing 2                                      | -2.2   |
| 7903893     | CD53     | CD53 molecule                                                                     | -2.2   |
| 7958410     | FICD     | FIC domain containing                                                             | -2.2   |
| 8125537     | HLA-DMA  | major histocompatibility complex, class II, DM alpha                              | -2.2   |
| 8131550     | SCIN     | scinderin                                                                         | -2.2   |
| 8056323     | FIGN     | fidgetin                                                                          | -2.2   |
| 7973084     | ANG      | angiogenin, ribonuclease, RNase A family, 5                                       | -2.2   |
| 8118345     | CFB      | complement factor B                                                               | -2.2   |
| 8157524     | TLR4     | toll-like receptor 4                                                              | -2.2   |
| 8126820     | GPR110   | G protein-coupled receptor 110                                                    | -2.2   |
| 7941148     | TM7SF2   | transmembrane 7 superfamily member 2                                              | -2.2   |
| 8113369     | SLCO4C1  | solute carrier organic anion transporter family, member 4C1                       | -2.2   |
| 8097513     | MGST2    | microsomal glutathione S-transferase 2                                            | -2.2   |
| 7962274     | KIF21A   | kinesin family member 21A                                                         | -2.2   |
| 7976783     | DLK1     | delta-like 1 homolog (Drosophila)                                                 | -2.2   |
| 7909877     | MARC1    | mitochondrial amidoxime reducing component 1                                      | -2.2   |
| 7961365     | MANSC1   | MANSC domain containing 1                                                         | -2.2   |
| 7914342     | FABP3    | fatty acid binding protein 3, muscle and heart (mammary-derived growth inhibitor) | -2.2   |
| 8140166     | RN5S233  | RNA, 5S ribosomal 233                                                             | -2.2   |
| 8147661     | SPAG1    | sperm associated antigen 1                                                        | -2.2   |
| 8168470     | COX7B    | cytochrome c oxidase subunit VIIb                                                 | -2.2   |
| 8028332     | KCNK6    | potassium channel, subfamily K, member 6                                          | -2.2   |
| 7929065     | IFIT1    | interferon-induced protein with tetratricopeptide repeats 1                       | -2.2   |

| probeset_id | Symbol   | Gene_Name                                                                          | FC_T/N |
|-------------|----------|------------------------------------------------------------------------------------|--------|
| 8122202     | MYB      | v-myb myeloblastosis viral oncogene homolog (avian)                                | 17.8   |
| 8122265     | TNFAIP3  | tumor necrosis factor, alpha-induced protein 3                                     | -2.2   |
| 8152355     | SYBU     | syntabulin (syntaxin-interacting)                                                  | -2.2   |
| 7943413     | BIRC3    | baculoviral IAP repeat containing 3                                                | -2.2   |
| 8037835     | SLC1A5   | solute carrier family 1 (neutral amino acid transporter), member 5                 | -2.2   |
| 8122196     | RN5S218  | RNA, 5S ribosomal 218                                                              | -2.2   |
| 7899023     | LDLRAP1  | low density lipoprotein receptor adaptor protein 1                                 | -2.2   |
| 8041582     | PKDCC    | protein kinase domain containing, cytoplasmic homolog (mouse)                      | -2.2   |
| 7965357     | GALNT4   | UDP-N-acetyl-alpha-D-galactosamine:polypeptide N-acetylgalactosaminyltransferase 4 | -2.2   |
| 8055872     | CACNB4   | calcium channel, voltage-dependent, beta 4 subunit                                 | -2.2   |
| 7902518     | GIPC2    | GIPC PDZ domain containing family, member 2                                        | -2.2   |
| 7944185     | CD3G     | CD3g molecule, gamma (CD3-TCR complex)                                             | -2.2   |
| 8169174     | RNF128   | ring finger protein 128, E3 ubiquitin protein ligase                               | -2.2   |
| 8175177     | MBNL3    | muscleblind-like splicing regulator 3                                              | -2.2   |
| 7917912     | DPYD     | dihydropyrimidine dehydrogenase                                                    | -2.2   |
| 8007043     | RAPGEFL1 | Rap guanine nucleotide exchange factor (GEF)-like 1                                | -2.2   |
| 7920082     | RORC     | RAR-related orphan receptor C                                                      | -2.2   |
| 7910377     | RN5S19   | RNA, 5S ribosomal 19                                                               | -2.2   |
| 8042310     | SLC1A4   | solute carrier family 1 (glutamate)                                                | -2.2   |
| 7995419     | RN5S425  | RNA, 5S ribosomal 425                                                              | -2.2   |
| 7956046     | DGKA     | diacylglycerol kinase, alpha 80kDa                                                 | -2.2   |
| 8066619     | PLTP     | phospholipid transfer protein                                                      | -2.3   |
| 8111677     | LIFR     | leukemia inhibitory factor receptor alpha                                          | -2.3   |
| 8108631     | VTRNA1-3 | vault RNA 1-3                                                                      | -2.3   |
| 7999253     | PPL      | periplakin                                                                         | -2.3   |
| 8115623     | ATP10B   | ATPase, class V, type 10B                                                          | -2.3   |
| 7956878     | IRAK3    | interleukin-1 receptor-associated kinase 3                                         | -2.3   |
| 8041225     | EHD3     | EH-domain containing 3                                                             | -2.3   |
| 8024062     | CFD      | complement factor D (adipsin)                                                      | -2.3   |
| 7930413     | DUSP5    | dual specificity phosphatase 5                                                     | -2.3   |
| 8056343     | COBLL1   | COBL-like 1                                                                        | -2.3   |
| 7991034     | HOMER2   | homer homolog 2 (Drosophila)                                                       | -2.3   |
| 7908409     | RGS2     | regulator of G-protein signaling 2, 24kDa                                          | -2.3   |
| 8152463     | RN5S276  | RNA, 5S ribosomal 276                                                              | -2.3   |
| 8101992     | SLC39A8  | solute carrier family 39 (zinc transporter), member 8                              | -2.3   |
| 8026861     | B3GNT3   | UDP-GlcNAc:betaGal beta-1,3-N-acetylglucosaminyltransferase 3                      | -2.3   |
| 8038747     | KLK12    | kallikrein-related peptidase 12                                                    | -2.3   |
| 8068383     | CLIC6    | chloride intracellular channel 6                                                   | -2.3   |
| 7936494     | GFRA1    | GDNF family receptor alpha 1                                                       | -2.3   |
| 7965040     | PHLDA1   | pleckstrin homology-like domain, family A, member 1                                | -2.3   |
| 8005638     | ALDH3A2  | aldehyde dehydrogenase 3 family, member A2                                         | -2.3   |
| 8163618     | TNFSF15  | tumor necrosis factor (ligand) superfamily, member 15                              | -2.3   |
| 7939150     | PRRG4    | proline rich Gla (G-carboxyglutamic acid) 4 (transmembrane)                        | -2.3   |

| probeset_id | Symbol       | Gene_Name                                                                                     | FC_T/N |
|-------------|--------------|-----------------------------------------------------------------------------------------------|--------|
| 8122202     | MYB          | v-myb myeloblastosis viral oncogene homolog (avian)                                           | 17.8   |
| 8144880     | SH2D4A       | SH2 domain containing 4A                                                                      | -2.3   |
| 7955348     | GPD1         | glycerol-3-phosphate dehydrogenase 1 (soluble)                                                | -2.3   |
| 8156321     | SYK          | spleen tyrosine kinase                                                                        | -2.3   |
| 7899160     | CD52         | CD52 molecule                                                                                 | -2.3   |
| 8016718     | CHAD         | chondroadherin                                                                                | -2.3   |
| 7924450     | DUSP10       | dual specificity phosphatase 10                                                               | -2.3   |
| 7961075     | CD69         | CD69 molecule                                                                                 | -2.3   |
| 7934997     | PPP1R3C      | protein phosphatase 1, regulatory subunit 3C                                                  | -2.3   |
| 8070579     | TFF1         | trefoil factor 1                                                                              | -2.3   |
| 8151310     | EYA1         | eyes absent homolog 1 (Drosophila)                                                            | -2.3   |
| 8143221     | ATP6V0A4     | ATPase, H <sup>+</sup> transporting, lysosomal V0 subunit a4                                  | -2.3   |
| 8009685     | SLC9A3R1     | solute carrier family 9, subfamily A (NHE3, cation proton antiporter 3), member 3 regulator 1 | -2.3   |
| 8084710     | ADIPOQ       | adiponectin, C1Q and collagen domain containing                                               | -2.3   |
| 8011671     | GGT6         | gamma-glutamyltransferase 6                                                                   | -2.3   |
| 8149811     | NKX3-1       | NK3 homeobox 1                                                                                | -2.3   |
| 7931832     | LOC100653286 | aldo-keto reductase family 1 member C2-like                                                   | -2.3   |
| 8146906     | RN5S271      | RNA, 5S ribosomal 271                                                                         | -2.3   |
| 7965964     | SLC41A2      | solute carrier family 41, member 2                                                            | -2.3   |
| 8000346     | ERN2         | endoplasmic reticulum to nucleus signaling 2                                                  | -2.3   |
| 8058627     | ERBB4        | v-erb-a erythroblastic leukemia viral oncogene homolog 4 (avian)                              | -2.3   |
| 8156761     | NANS         | N-acetylneuraminic acid synthase                                                              | -2.3   |
| 8155849     | ANXA1        | annexin A1                                                                                    | -2.3   |
| 8161945     | RASEF        | RAS and EF-hand domain containing                                                             | -2.3   |
| 7912706     | EPHA2        | EPH receptor A2                                                                               | -2.3   |
| 8173745     | CYSLTR1      | cysteinyl leukotriene receptor 1                                                              | -2.3   |
| 8028652     | ZFP36        | zinc finger protein 36, C3H type, homolog (mouse)                                             | -2.4   |
| 8072170     | KREMEN1      | kringle containing transmembrane protein 1                                                    | -2.4   |
| 8082797     | TF           | transferrin                                                                                   | -2.4   |
| 8139712     | VOPPI        | vesicular, overexpressed in cancer, prosurvival protein 1                                     | -2.4   |
| 8009301     | PRKCA        | protein kinase C, alpha                                                                       | -2.4   |
| 8152606     | SNTB1        | syntrophin, beta 1 (dystrophin-associated protein A1, 59kDa, basic component 1)               | -2.4   |
| 8084717     | ST6GAL1      | ST6 beta-galactosamide alpha-2,6-sialyltransferase 1                                          | -2.4   |
| 8174361     | TSC22D3      | TSC22 domain family, member 3                                                                 | -2.4   |
| 7907702     | SOAT1        | sterol O-acyltransferase 1                                                                    | -2.4   |
| 7971690     | RN5S29       | RNA, 5S ribosomal 29                                                                          | -2.4   |
| 8161892     | GNA14        | guanine nucleotide binding protein (G protein), alpha 14                                      | -2.4   |
| 8047272     | SPATS2L      | spermatogenesis associated, serine-rich 2-like                                                | -2.4   |
| 7929816     | SCD          | stearoyl-CoA desaturase (delta-9-desaturase)                                                  | -2.4   |
| 8011516     | ATP2A3       | ATPase, Ca <sup>++</sup> transporting, ubiquitous                                             | -2.4   |
| 7968789     | RGCC         | regulator of cell cycle                                                                       | -2.4   |
| 8161568     | LOC642424    | ig kappa chain V-I region Walker-like                                                         | -2.4   |
| 8059580     | DNER         | delta                                                                                         | -2.4   |



| probeset_id | Symbol   | Gene_Name                                                                | FC_T/N |
|-------------|----------|--------------------------------------------------------------------------|--------|
| 8122202     | MYB      | v-myb myeloblastosis viral oncogene homolog (avian)                      | 17.8   |
| 8108447     | CXXC5    | CXXC finger protein 5                                                    | -2.4   |
| 8104447     | RN5S177  | RNA, 5S ribosomal 177                                                    | -2.4   |
| 8013384     | ALDH3A1  | aldehyde dehydrogenase 3 family, member A1                               | -2.4   |
| 7958913     | OAS2     | 2'-5'-oligoadenylate synthetase 2, 69                                    | -2.4   |
| 7994265     | RN5S405  | RNA, 5S ribosomal 405                                                    | -2.5   |
| 8119016     | MAPK13   | mitogen-activated protein kinase 13                                      | -2.5   |
| 8081288     | TMEM45A  | transmembrane protein 45A                                                | -2.5   |
| 7922174     | F5       | coagulation factor V (proaccelerin, labile factor)                       | -2.5   |
| 7975076     | HSPA2    | heat shock 70kDa protein 2                                               | -2.5   |
| 8108912     | SH3RF2   | SH3 domain containing ring finger 2                                      | -2.5   |
| 7966259     | GLTP     | glycolipid transfer protein                                              | -2.5   |
| 8114572     | HBEGF    | heparin-binding EGF-like growth factor                                   | -2.5   |
| 8003156     | RN5S433  | RNA, 5S ribosomal 433                                                    | -2.5   |
| 7942957     | PRSS23   | protease, serine, 23                                                     | -2.5   |
| 7997662     | KIAA0513 | KIAA0513                                                                 | -2.5   |
| 7995362     | GPT2     | glutamic pyruvate transaminase (alanine aminotransferase) 2              | -2.5   |
| 8121838     | TPD52L1  | tumor protein D52-like 1                                                 | -2.5   |
| 8096602     | DAPP1    | dual adaptor of phosphotyrosine and 3-phosphoinositides                  | -2.5   |
| 8016390     | COPZ2    | coatamer protein complex, subunit zeta 2                                 | -2.5   |
| 7903227     | PALMD    | palmdelphin                                                              | -2.5   |
| 8131600     | TSPAN13  | tetraspanin 13                                                           | -2.5   |
| 8001547     | PLLP     | plasmolipin                                                              | -2.5   |
| 7949971     | CPT1A    | carnitine palmitoyltransferase 1A (liver)                                | -2.5   |
| 7981720     | IGHV3-35 | immunoglobulin heavy variable 3-35 (non-functional)                      | -2.5   |
| 8171624     | GPR64    | G protein-coupled receptor 64                                            | -2.5   |
| 8059642     | SLC16A14 | solute carrier family 16, member 14 (monocarboxylic acid transporter 14) | -2.5   |
| 8125919     | FKBP5    | FK506 binding protein 5                                                  | -2.5   |
| 8041542     | GALM     | galactose mutarotase (aldose 1-epimerase)                                | -2.5   |
| 7967318     | HCAR2    | hydroxycarboxylic acid receptor 2                                        | -2.5   |
| 8008588     | HLF      | hepatic leukemia factor                                                  | -2.5   |
| 8134834     | AGFG2    | ArfGAP with FG repeats 2                                                 | -2.6   |
| 8040249     | ATP6V1C2 | ATPase, H <sup>+</sup> transporting, lysosomal 42kDa, V1 subunit C2      | -2.6   |
| 8155930     | GCNT1    | glucosaminyl (N-acetyl) transferase 1, core 2                            | -2.6   |
| 8017867     | FAM20A   | family with sequence similarity 20, member A                             | -2.6   |
| 8101762     | SNCA     | synuclein, alpha (non A4 component of amyloid precursor)                 | -2.6   |
| 8170119     | FHL1     | four and a half LIM domains 1                                            | -2.6   |
| 7907260     | FMO6P    | flavin containing monooxygenase 6 pseudogene                             | -2.6   |
| 8021301     | RAB27B   | RAB27B, member RAS oncogene family                                       | -2.6   |
| 8047300     | AOX1     | aldehyde oxidase 1                                                       | -2.6   |
| 8078971     | ENTPD3   | ectonucleoside triphosphate diphosphohydrolase 3                         | -2.6   |
| 8078933     | MYRIP    | myosin VIIA and Rab interacting protein                                  | -2.6   |
| 8007493     | ARL4D    | ADP-ribosylation factor-like 4D                                          | -2.6   |

| probeset_id | Symbol       | Gene_Name                                                                           | FC_T/N |
|-------------|--------------|-------------------------------------------------------------------------------------|--------|
| 8122202     | MYB          | v-myb myeloblastosis viral oncogene homolog (avian)                                 | 17.8   |
| 8023497     | ATP8B1       | ATPase, aminophospholipid transporter, class I, type 8B, member 1                   | -2.6   |
| 8048717     | SGPP2        | sphingosine-1-phosphate phosphatase 2                                               | -2.6   |
| 8073680     | TRNAU2       | transfer RNA selenocysteine 2 (anticodon UCA)                                       | -2.6   |
| 8029136     | CD79A        | CD79a molecule, immunoglobulin-associated alpha                                     | -2.6   |
| 8081171     | CRYBG3       | beta-gamma crystallin domain containing 3                                           | -2.6   |
| 8052355     | EFEMP1       | EGF containing fibulin-like extracellular matrix protein 1                          | -2.6   |
| 7935337     | PIK3AP1      | phosphoinositide-3-kinase adaptor protein 1                                         | -2.7   |
| 8143144     | PTN          | pleiotrophin                                                                        | -2.7   |
| 7981068     | SERPINA1     | serpin peptidase inhibitor, clade A (alpha-1 antiproteinase, antitrypsin), member 1 | -2.7   |
| 8108627     | VTRNA1-1     | vault RNA 1-1                                                                       | -2.7   |
| 7913385     | RAP1GAP      | RAP1 GTPase activating protein                                                      | -2.7   |
| 8070567     | TFF3         | trefoil factor 3 (intestinal)                                                       | -2.7   |
| 7913667     | GALE         | UDP-galactose-4-epimerase                                                           | -2.7   |
| 8033987     | ICAM3        | intercellular adhesion molecule 3                                                   | -2.7   |
| 7936463     | ABLIM1       | actin binding LIM protein 1                                                         | -2.7   |
| 7974835     | PRKCH        | protein kinase C, eta                                                               | -2.7   |
| 8133721     | HSPB1        | heat shock 27kDa protein 1                                                          | -2.7   |
| 7970441     | GJB2         | gap junction protein, beta 2, 26kDa                                                 | -2.7   |
| 7901256     | CYP4B1       | cytochrome P450, family 4, subfamily B, polypeptide 1                               | -2.7   |
| 7950906     | CTSC         | cathepsin C                                                                         | -2.7   |
| 8021528     | TNFRSF11A    | tumor necrosis factor receptor superfamily, member 11a, NFkB activator              | -2.7   |
| 8078386     | GPD1L        | glycerol-3-phosphate dehydrogenase 1-like                                           | -2.7   |
| 8014316     | CCL5         | chemokine (C-C motif) ligand 5                                                      | -2.7   |
| 8113220     | ELL2         | elongation factor, RNA polymerase II, 2                                             | -2.7   |
| 8043484     | IGKV1OR2-118 | immunoglobulin kappa variable 1                                                     | -2.7   |
| 8002882     | CHST6        | carbohydrate (N-acetylglucosamine 6-O) sulfotransferase 6                           | -2.7   |
| 8103951     | ACSL1        | acyl-CoA synthetase long-chain family member 1                                      | -2.7   |
| 8055980     | CYTIP        | cytohesin 1 interacting protein                                                     | -2.7   |
| 8121257     | PRDM1        | PR domain containing 1, with ZNF domain                                             | -2.7   |
| 7938629     | PDE3B        | phosphodiesterase 3B, cGMP-inhibited                                                | -2.7   |
| 8116439     | SCGB3A1      | secretoglobin, family 3A, member 1                                                  | -2.7   |
| 7958884     | OAS1         | 2'-5'-oligoadenylate synthetase 1, 40                                               | -2.7   |
| 8174277     | RN5S511      | RNA, 5S ribosomal 511                                                               | -2.7   |
| 8146934     | LY96         | lymphocyte antigen 96                                                               | -2.7   |
| 7991762     | HBA1         | hemoglobin, alpha 1                                                                 | -2.7   |
| 7956826     | TBC1D30      | TBC1 domain family, member 30                                                       | -2.8   |
| 7922976     | PTGS2        | prostaglandin-endoperoxide synthase 2 (prostaglandin G                              | -2.8   |
| 8103769     | HPGD         | hydroxyprostaglandin dehydrogenase 15-(NAD)                                         | -2.8   |
| 8038633     | KLK1         | kallikrein 1                                                                        | -2.8   |
| 8134452     | BHLHA15      | basic helix-loop-helix family, member a15                                           | -2.8   |
| 8101828     | TSPAN5       | tetraspanin 5                                                                       | -2.8   |
| 7932160     | FAM107B      | family with sequence similarity 107, member B                                       | -2.8   |

| probeset_id | Symbol       | Gene_Name                                                                        | FC_T/N |
|-------------|--------------|----------------------------------------------------------------------------------|--------|
| 8122202     | MYB          | v-myb myeloblastosis viral oncogene homolog (avian)                              | 17.8   |
| 8163257     | LPAR1        | lysophosphatidic acid receptor 1                                                 | -2.8   |
| 8056545     | STK39        | serine threonine kinase 39                                                       | -2.8   |
| 7961320     | PRB1         | proline-rich protein BstNI subfamily 1                                           | -2.8   |
| 7909214     | RASSF5       | Ras association (RalGDS                                                          | -2.8   |
| 8153002     | NDRG1        | N-myc downstream regulated 1                                                     | -2.8   |
| 7996563     | HSD11B2      | hydroxysteroid (11-beta) dehydrogenase 2                                         | -2.8   |
| 8098611     | TLR3         | toll-like receptor 3                                                             | -2.8   |
| 7928944     | PAPSS2       | 3'-phosphoadenosine 5'-phosphosulfate synthase 2                                 | -2.9   |
| 8091537     | IGSF10       | immunoglobulin superfamily, member 10                                            | -2.9   |
| 7983512     | SQRDL        | sulfide quinone reductase-like (yeast)                                           | -2.9   |
| 7928543     | RN5S321      | RNA, 5S ribosomal 321                                                            | -2.9   |
| 8068583     | KCNJ15       | potassium inwardly-rectifying channel, subfamily J, member 15                    | -2.9   |
| 8161174     | GNE          | glucosamine (UDP-N-acetyl)-2-epimerase                                           | -2.9   |
| 8032392     | MKNK2        | MAP kinase interacting serine                                                    | -2.9   |
| 8113512     | EPB41L4A     | erythrocyte membrane protein band 4.1 like 4A                                    | -2.9   |
| 8163002     | KLF4         | Kruppel-like factor 4 (gut)                                                      | -2.9   |
| 7988990     | WDR72        | WD repeat domain 72                                                              | -2.9   |
| 8126891     | CRISP2       | cysteine-rich secretory protein 2                                                | -2.9   |
| 7934898     | ANKRD22      | ankyrin repeat domain 22                                                         | -2.9   |
| 7984001     | GCNT3        | glucosaminyl (N-acetyl) transferase 3, mucin type                                | -2.9   |
| 7977933     | SLC7A8       | solute carrier family 7 (amino acid transporter light chain, L system), member 8 | -2.9   |
| 8101904     | ADH7         | alcohol dehydrogenase 7 (class IV), mu or sigma polypeptide                      | -3.0   |
| 8090314     | ALDH1L1      | aldehyde dehydrogenase 1 family, member L1                                       | -3.0   |
| 8071658     | IGLV7-46     | immunoglobulin lambda variable 7-46 (gene                                        | -3.0   |
| 8115831     | DUSP1        | dual specificity phosphatase 1                                                   | -3.0   |
| 7919800     | CTSS         | cathepsin S                                                                      | -3.0   |
| 8033043     | FUT6         | fucosyltransferase 6 (alpha (1,3) fucosyltransferase)                            | -3.0   |
| 7922130     | DPT          | dermatopontin                                                                    | -3.0   |
| 8120961     | MRAP2        | melanocortin 2 receptor accessory protein 2                                      | -3.0   |
| 8049487     | MLPH         | melanophilin                                                                     | -3.0   |
| 7919055     | HMGCS2       | 3-hydroxy-3-methylglutaryl-CoA synthase 2 (mitochondrial)                        | -3.0   |
| 8005879     | SLC13A2      | solute carrier family 13 (sodium-dependent dicarboxylate transporter), member 2  | -3.0   |
| 8146115     | C8orf4       | chromosome 8 open reading frame 4                                                | -3.0   |
| 8129254     | MAN1A1       | mannosidase, alpha, class 1A, member 1                                           | -3.0   |
| 7960362     | LOC100128816 | ACA3104                                                                          | -3.0   |
| 8030094     | FUT2         | fucosyltransferase 2 (secretor status included)                                  | -3.0   |
| 7915910     | PDZK1IP1     | PDZK1 interacting protein 1                                                      | -3.0   |
| 8052940     | PAIP2B       | poly(A) binding protein interacting protein 2B                                   | -3.1   |
| 8144786     | SLC7A2       | solute carrier family 7 (cationic amino acid transporter, y+ system), member 2   | -3.1   |
| 8101881     | ADH1B        | alcohol dehydrogenase 1B (class I), beta polypeptide                             | -3.1   |
| 7917276     | LPAR3        | lysophosphatidic acid receptor 3                                                 | -3.1   |
| 7958784     | ALDH2        | aldehyde dehydrogenase 2 family (mitochondrial)                                  | -3.1   |

| probeset_id | Symbol    | Gene_Name                                                                          | FC_T/N |
|-------------|-----------|------------------------------------------------------------------------------------|--------|
| 8122202     | MYB       | v-myb myeloblastosis viral oncogene homolog (avian)                                | 17.8   |
| 8127854     | ME1       | malic enzyme 1, NADP(+)-dependent, cytosolic                                       | -3.1   |
| 8089145     | ABI3BP    | ABI family, member 3 (NESH) binding protein                                        | -3.1   |
| 7916432     | DHCR24    | 24-dehydrocholesterol reductase                                                    | -3.1   |
| 8103226     | TMEM154   | transmembrane protein 154                                                          | -3.1   |
| 8141094     | PDK4      | pyruvate dehydrogenase kinase, isozyme 4                                           | -3.2   |
| 8045882     | DAPL1     | death associated protein-like 1                                                    | -3.2   |
| 7981722     | IGHV3-38  | immunoglobulin heavy variable 3-38 (non-functional)                                | -3.2   |
| 7955297     | AQP5      | aquaporin 5                                                                        | -3.2   |
| 8150889     | SDR16C5   | short chain dehydrogenase                                                          | -3.2   |
| 7946579     | LYVE1     | lymphatic vessel endothelial hyaluronan receptor 1                                 | -3.2   |
| 8001457     | CES1      | carboxylesterase 1                                                                 | -3.2   |
| 8157264     | SLC31A2   | solute carrier family 31 (copper transporters), member 2                           | -3.2   |
| 7922598     | ANGPTL1   | angiotensin-like 1                                                                 | -3.2   |
| 8165453     | LRRC26    | leucine rich repeat containing 26                                                  | -3.2   |
| 8147132     | CA2       | carbonic anhydrase II                                                              | -3.2   |
| 8053713     | IGKV2-10  | immunoglobulin kappa variable 2-10 (pseudogene)                                    | -3.2   |
| 7979505     | SIX1      | SIX homeobox 1                                                                     | -3.2   |
| 8002303     | NQO1      | NAD(P)H dehydrogenase, quinone 1                                                   | -3.2   |
| 8160889     | CCL21     | chemokine (C-C motif) ligand 21                                                    | -3.2   |
| 7920297     | S100A14   | S100 calcium binding protein A14                                                   | -3.3   |
| 8046099     | NOSTRIN   | nitric oxide synthase trafficker                                                   | -3.3   |
| 7981737     | IGHV3-72  | immunoglobulin heavy variable 3-72                                                 | -3.3   |
| 8043433     | IGKC      | immunoglobulin kappa constant                                                      | -3.3   |
| 7913593     | TCEA3     | transcription elongation factor A (SII), 3                                         | -3.3   |
| 8101429     | PLAC8     | placenta-specific 8                                                                | -3.3   |
| 7979179     | ERO1L     | ERO1-like (S. cerevisiae)                                                          | -3.3   |
| 8092726     | CLDN1     | claudin 1                                                                          | -3.3   |
| 7988414     | GATM      | glycine amidinotransferase (L-arginine:glycine amidinotransferase)                 | -3.3   |
| 8123598     | SERPINB1  | serpin peptidase inhibitor, clade B (ovalbumin), member 1                          | -3.4   |
| 7963313     | GALNT6    | UDP-N-acetyl-alpha-D-galactosamine:polypeptide N-acetylgalactosaminyltransferase 6 | -3.4   |
| 8043474     | IGKV1D-42 | immunoglobulin kappa variable 1D-42 (non-functional)                               | -3.4   |
| 8081710     | SIDT1     | SID1 transmembrane family, member 1                                                | -3.4   |
| 7906613     | SLAMF7    | SLAM family member 7                                                               | -3.4   |
| 7979658     | GPX2      | glutathione peroxidase 2 (gastrointestinal)                                        | -3.4   |
| 8043360     | IGKV3-7   | immunoglobulin kappa variable 3-7 (non-functional)                                 | -3.5   |
| 8067125     | BCAS1     | breast carcinoma amplified sequence 1                                              | -3.5   |
| 8142585     | CADPS2    | Ca <sup>++</sup> -dependent secretion activator 2                                  | -3.5   |
| 8106448     | PDE8B     | phosphodiesterase 8B                                                               | -3.5   |
| 8043459     | IGKV1D-16 | immunoglobulin kappa variable 1D-16                                                | -3.5   |
| 7946033     | HBB       | hemoglobin, beta                                                                   | -3.5   |
| 8135544     | FOXP2     | forkhead box P2                                                                    | -3.5   |
| 8163181     | C9orf152  | chromosome 9 open reading frame 152                                                | -3.5   |

| probeset_id | Symbol     | Gene_Name                                                                                  | FC_T/N |
|-------------|------------|--------------------------------------------------------------------------------------------|--------|
| 8122202     | MYB        | v-myb myeloblastosis viral oncogene homolog (avian)                                        | 17.8   |
| 8161884     | PRUNE2     | prune homolog 2 (Drosophila)                                                               | -3.5   |
| 7925452     | GREM2      | gremlin 2                                                                                  | -3.5   |
| 7907160     | ATP1B1     | ATPase, Na+                                                                                | -3.5   |
| 7938687     | NUCB2      | nucleobindin 2                                                                             | -3.5   |
| 7981732     | IGHV4-61   | immunoglobulin heavy variable 4-61                                                         | -3.5   |
| 8075182     | XBPI       | X-box binding protein 1                                                                    | -3.6   |
| 7951686     | IL18       | interleukin 18 (interferon-gamma-inducing factor)                                          | -3.6   |
| 7944931     | SLC37A2    | solute carrier family 37 (glycerol-3-phosphate transporter), member 2                      | -3.6   |
| 8118069     | MUC21      | mucin 21, cell surface associated                                                          | -3.6   |
| 8038735     | KLK11      | kallikrein-related peptidase 11                                                            | -3.6   |
| 8088180     | WNT5A      | wingless-type MMTV integration site family, member 5A                                      | -3.6   |
| 7960365     | EFCAB4B    | EF-hand calcium binding domain 4B                                                          | -3.6   |
| 8043443     | IGKV2-24   | immunoglobulin kappa variable 2-24                                                         | -3.6   |
| 7944164     | TMPRSS4    | transmembrane protease, serine 4                                                           | -3.6   |
| 8163908     | GGTA1P     | glycoprotein, alpha-galactosyltransferase 1 pseudogene                                     | -3.7   |
| 8140840     | STEAP4     | STEAP family member 4                                                                      | -3.7   |
| 8029086     | CEACAM5    | carcinoembryonic antigen-related cell adhesion molecule 5                                  | -3.7   |
| 8103877     | CLDN22     | claudin 22                                                                                 | -3.7   |
| 7922846     | FAM129A    | family with sequence similarity 129, member A                                              | -3.7   |
| 8043446     | IGKV6-21   | immunoglobulin kappa variable 6-21 (non-functional)                                        | -3.7   |
| 8122071     | ENPP3      | ectonucleotide pyrophosphatase                                                             | -3.7   |
| 7981730     | IGLJ3      | immunoglobulin lambda joining 3                                                            | -3.7   |
| 7991283     | RHCG       | Rh family, C glycoprotein                                                                  | -3.8   |
| 8033054     | FUT3       | fucosyltransferase 3 (galactoside 3(4)-L-fucosyltransferase, Lewis blood group)            | -3.8   |
| 8156770     | GALNT12    | UDP-N-acetyl-alpha-D-galactosamine:polypeptide N-acetylgalactosaminyltransferase 12        | -3.8   |
| 8125843     | SPDEF      | SAM pointed domain containing ets transcription factor                                     | -3.8   |
| 8018774     | ST6GALNAC1 | ST6 (alpha-N-acetyl-neuraminyl-2,3-beta-galactosyl-1,3)-N-acetylgalactosaminide alpha-2,6- | -3.8   |
| 7944023     | NXPE2      | neurexophilin and PC-esterase domain family, member 2                                      | -3.8   |
| 8173444     | IL2RG      | interleukin 2 receptor, gamma                                                              | -3.8   |
| 7973974     | PAX9       | paired box 9                                                                               | -3.8   |
| 8043470     | IGKV3D-11  | immunoglobulin kappa variable 3D-11                                                        | -3.9   |
| 8021453     | SEC11C     | SEC11 homolog C (S. cerevisiae)                                                            | -3.9   |
| 8162502     | FBP1       | fructose-1,6-bisphosphatase 1                                                              | -3.9   |
| 8106354     | IQGAP2     | IQ motif containing GTPase activating protein 2                                            | -3.9   |
| 8128123     | RRAGD      | Ras-related GTP binding D                                                                  | -3.9   |
| 8096459     | RN5S164    | RNA, 5S ribosomal 164                                                                      | -3.9   |
| 8172204     | MAOB       | monoamine oxidase B                                                                        | -4.0   |
| 7959102     | HSPB8      | heat shock 22kDa protein 8                                                                 | -4.0   |
| 7965979     | ALDH1L2    | aldehyde dehydrogenase 1 family, member L2                                                 | -4.0   |
| 8043449     | IGK@       | immunoglobulin kappa locus                                                                 | -4.0   |
| 8120833     | SH3BGR12   | SH3 domain binding glutamic acid-rich protein like 2                                       | -4.0   |
| 8043465     | IGKV1D-13  | immunoglobulin kappa variable 1D-13                                                        | -4.0   |

| probeset_id | Symbol    | Gene_Name                                                                               | FC_T/N |
|-------------|-----------|-----------------------------------------------------------------------------------------|--------|
| 8122202     | MYB       | v-myb myeloblastosis viral oncogene homolog (avian)                                     | 17.8   |
| 7902738     | CLCA4     | chloride channel accessory 4                                                            | -4.0   |
| 7993638     | TMC5      | transmembrane channel-like 5                                                            | -4.1   |
| 8078227     | KAT2B     | K(lysine) acetyltransferase 2B                                                          | -4.1   |
| 8133876     | CD36      | CD36 molecule (thrombospondin receptor)                                                 | -4.1   |
| 7961252     | PRR4      | proline rich 4 (lacrimal)                                                               | -4.1   |
| 8149927     | CLU       | clusterin                                                                               | -4.1   |
| 7983239     | CKMT1A    | creatine kinase, mitochondrial 1A                                                       | -4.1   |
| 8084165     | SOX2      | SRY (sex determining region Y)-box 2                                                    | -4.1   |
| 7987385     | MEIS2     | Meis homeobox 2                                                                         | -4.2   |
| 7904361     | FAM46C    | family with sequence similarity 46, member C                                            | -4.2   |
| 8136709     | LOC93432  | maltase-glucoamylase (alpha-glucosidase) pseudogene                                     | -4.2   |
| 8045835     | GALNT5    | UDP-N-acetyl-alpha-D-galactosamine:polypeptide N-acetylgalactosaminyltransferase 5      | -4.3   |
| 7939642     | CREB3L1   | cAMP responsive element binding protein 3-like 1                                        | -4.3   |
| 7960529     | SCNN1A    | sodium channel, non-voltage-gated 1 alpha subunit                                       | -4.3   |
| 7923850     | SLC26A9   | solute carrier family 26, member 9                                                      | -4.3   |
| 8095451     | C4orf40   | chromosome 4 open reading frame 40                                                      | -4.3   |
| 8037197     | CXCL17    | chemokine (C-X-C motif) ligand 17                                                       | -4.4   |
| 7981740     | IGHV3-74  | immunoglobulin heavy variable 3-74                                                      | -4.4   |
| 8066493     | SLPI      | secretory leukocyte peptidase inhibitor                                                 | -4.5   |
| 8123246     | SLC22A3   | solute carrier family 22 (extraneuronal monoamine transporter), member 3                | -4.6   |
| 8090433     | MGLL      | monoglyceride lipase                                                                    | -4.7   |
| 7947156     | MUC15     | mucin 15, cell surface associated                                                       | -4.7   |
| 8043476     | IGKV1D-43 | immunoglobulin kappa variable 1D-43                                                     | -4.7   |
| 7981718     | IGHV3-33  | immunoglobulin heavy variable 3-33                                                      | -4.7   |
| 8095488     | SMR3A     | submaxillary gland androgen regulated protein 3A                                        | -4.8   |
| 7964722     | WIF1      | WNT inhibitory factor 1                                                                 | -4.8   |
| 7966749     | TESC      | tescalcin                                                                               | -4.9   |
| 8043431     | IGKV1-33  | immunoglobulin kappa variable 1-33                                                      | -4.9   |
| 8061847     | BPIFA2    | BPI fold containing family A, member 2                                                  | -5.0   |
| 8158167     | LCN2      | lipocalin 2                                                                             | -5.0   |
| 8138289     | ETV1      | ets variant 1                                                                           | -5.0   |
| 7945169     | TMEM45B   | transmembrane protein 45B                                                               | -5.1   |
| 7981728     | IGHV3-52  | immunoglobulin heavy variable 3-52 (pseudogene)                                         | -5.1   |
| 8043436     | IGKV2D-29 | immunoglobulin kappa variable 2D-29                                                     | -5.2   |
| 8082673     | ACPP      | acid phosphatase, prostate                                                              | -5.2   |
| 8148059     | DEPTOR    | DEP domain containing MTOR-interacting protein                                          | -5.3   |
| 8095751     | PARM1     | prostate androgen-regulated mucin-like protein 1                                        | -5.3   |
| 8095467     | FDCSP     | follicular dendritic cell secreted protein                                              | -5.5   |
| 8043468     | IGKV1-12  | immunoglobulin kappa variable 1-12                                                      | -5.7   |
| 8029098     | CEACAM6   | carcinoembryonic antigen-related cell adhesion molecule 6 (non-specific cross reacting) | -5.8   |
| 8088425     | FAM3D     | family with sequence similarity 3, member D                                             | -6.2   |
| 7964927     | TSPAN8    | tetraspanin 8                                                                           | -6.2   |

| probeset_id | Symbol    | Gene_Name                                                                                 | FC_T/N |
|-------------|-----------|-------------------------------------------------------------------------------------------|--------|
| 8122202     | MYB       | v-myb myeloblastosis viral oncogene homolog (avian)                                       | 17.8   |
| 8101893     | ADH1C     | alcohol dehydrogenase 1C (class I), gamma polypeptide                                     | -6.3   |
| 8095380     | TMPRSS11E | transmembrane protease, serine 11E                                                        | -6.4   |
| 8095435     | HTN1      | histatin 1                                                                                | -6.5   |
| 8008736     | LPO       | lactoperoxidase                                                                           | -6.6   |
| 8149097     | DEFB1     | defensin, beta 1                                                                          | -6.8   |
| 8043441     | IGKV1D-27 | immunoglobulin kappa variable 1D-27 (pseudogene)                                          | -6.8   |
| 7989501     | CA12      | carbonic anhydrase XII                                                                    | -6.9   |
| 7992732     | ZG16B     | zymogen granule protein 16 homolog B (rat)                                                | -6.9   |
| 8151532     | FABP4     | fatty acid binding protein 4, adipocyte                                                   | -7.1   |
| 7901175     | TSPAN1    | tetraspanin 1                                                                             | -7.2   |
| 8160670     | AQP3      | aquaporin 3 (Gill blood group)                                                            | -7.3   |
| 8056222     | DPP4      | dipeptidyl-peptidase 4                                                                    | -7.5   |
| 8061780     | BPIFB2    | BPI fold containing family B, member 2                                                    | -7.6   |
| 7948444     | TCN1      | transcobalamin I (vitamin B12 binding protein, R binder family)                           | -7.6   |
| 8161755     | ALDH1A1   | aldehyde dehydrogenase 1 family, member A1                                                | -7.7   |
| 8173869     | POF1B     | premature ovarian failure, 1B                                                             | -8.6   |
| 8095491     | SMR3B     | submaxillary gland androgen regulated protein 3B                                          | -9.0   |
| 8095456     | ODAM      | odontogenic, ameloblast associated                                                        | -9.1   |
| 8138381     | AGR2      | anterior gradient 2 homolog (Xenopus laevis)                                              | -9.3   |
| 8100827     | IGJ       | immunoglobulin J polypeptide, linker protein for immunoglobulin alpha and mu polypeptides | -9.6   |
| 8068684     | FAM3B     | family with sequence similarity 3, member B                                               | -10.1  |
| 8061894     | BPIFB1    | BPI fold containing family B, member 1                                                    | -10.8  |
| 8095504     | MUC7      | mucin 7, secreted                                                                         | -10.9  |
| 7957023     | LYZ       | lysozyme                                                                                  | -11.2  |
| 7923929     | PIGR      | polymeric immunoglobulin receptor                                                         | -12.8  |
| 7931108     | DMBT1     | deleted in malignant brain tumors 1                                                       | -13.2  |
| 8095422     | STATH     | statherin                                                                                 | -17.5  |
| 8136839     | PIP       | prolactin-induced protein                                                                 | -20.7  |
| 8126905     | CRISP3    | cysteine-rich secretory protein 3                                                         | -22.4  |

**Supplementary Table 2: Significantly expressed miRNAs in adenoid cystic cancers compared to matched normal tissues.** Paired t-test, FDR=0.05; Baseline filter:  $\max\{\text{tumor, normal}\} \geq 800$ ; Variation filter:  $|\text{fold change}| \geq 2.0$ .

| Probe_id           | avg_Tumor Intensity | avg_Normal Intensity | Fold Change (T/N) |
|--------------------|---------------------|----------------------|-------------------|
| hsa-miR-375_st     | 141.5               | 2246.3               | -15.9             |
| hsa-miR-31_st      | 166.6               | 1595.7               | -9.6              |
| hsa-miR-150_st     | 157.4               | 932.0                | -5.9              |
| hsa-miR-152_st     | 360.8               | 1091.2               | -3.0              |
| hsa-miR-214_st     | 1110.2              | 2843.3               | -2.6              |
| hsa-miR-29a_st     | 703.1               | 1775.7               | -2.5              |
| hsa-miR-126_st     | 1107.0              | 2601.3               | -2.3              |
| hsa-miR-140-3p_st  | 1495.8              | 3500.5               | -2.3              |
| hsa-miR-199b-3p_st | 818.9               | 1736.1               | -2.1              |
| hsa-miR-923_st     | 2063.4              | 4337.1               | -2.1              |
| hsa-miR-199a-3p_st | 851.2               | 1730.1               | -2.0              |
| hsa-miR-652_st     | 857.6               | 367.9                | 2.3               |
| hsa-miR-130a_st    | 1506.2              | 618.4                | 2.4               |
| hsa-miR-93_st      | 6382.9              | 2530.1               | 2.5               |
| hsa-miR-182_st     | 2689.9              | 1048.5               | 2.6               |
| hsa-miR-181a_st    | 5502.4              | 1984.0               | 2.8               |
| hsa-miR-106b_st    | 3972.5              | 1422.5               | 2.8               |
| hsa-miR-146a_st    | 2791.2              | 979.5                | 2.8               |
| hsa-miR-25_st      | 1687.7              | 533.7                | 3.2               |
| hsa-miR-744_st     | 820.3               | 250.3                | 3.3               |
| hsa-miR-181b_st    | 2799.3              | 597.0                | 4.7               |
| hsa-miR-455-3p_st  | 7361.8              | 549.1                | 13.4              |
